# Supplementary material for: Making shared decision-making (SDM) a reality: protocol of a large-scale long-term SDM implementation programme at a Northern German University Hospital
Source: PubMed Central journal article supplement — BMJ Open. 2020 Oct 10;10(10):e037575. doi: 10.1136/bmjopen-2020-037575 (PMC7549440; doi:10.1136/bmjopen-2020-037575), 2020-10-10
Supplement: bmjopen-2020-037575.draft_revisions.pdf [file bmjopen-2020-037575.draft_revisions.pdf]

# BMJ Open

BMJ Open is committed to open peer review. As part of this commitment we make the peer review history of every article we publish publicly available.

When an article is published we post the peer reviewers' comments and the authors' responses online. We also post the versions of the paper that were used during peer review. These are the versions that the peer review comments apply to.

The versions of the paper that follow are the versions that were submitted during the peer review process. They are not the versions of record or the final published versions. They should not be cited or distributed as the published version of this manuscript.

BMJ Open is an open access journal and the full, final, typeset and author-corrected version of record of the manuscript is available on our site with no access controls, subscription charges or pay-per-view fees (<http://bmjopen.bmj.com>).

If you have any questions on BMJ Open's open peer review process please email [info.bmjopen@bmj.com](mailto:info.bmjopen@bmj.com)

# BMJ Open

## Making Shared Decision Making (SDM) a Reality: protocol of a full SDM implementation program at a Northern German University Hospital

|                               |                                                                                                                                                                                                                                                                                                                                                                                                                                                                                                                                                                                                                                                                                                                                                                                                                                                                                                                                                                                                                                                 |
|-------------------------------|-------------------------------------------------------------------------------------------------------------------------------------------------------------------------------------------------------------------------------------------------------------------------------------------------------------------------------------------------------------------------------------------------------------------------------------------------------------------------------------------------------------------------------------------------------------------------------------------------------------------------------------------------------------------------------------------------------------------------------------------------------------------------------------------------------------------------------------------------------------------------------------------------------------------------------------------------------------------------------------------------------------------------------------------------|
| Journal:                      | <i>BMJ Open</i>                                                                                                                                                                                                                                                                                                                                                                                                                                                                                                                                                                                                                                                                                                                                                                                                                                                                                                                                                                                                                                 |
| Manuscript ID                 | bmjopen-2020-037575                                                                                                                                                                                                                                                                                                                                                                                                                                                                                                                                                                                                                                                                                                                                                                                                                                                                                                                                                                                                                             |
| Article Type:                 | Protocol                                                                                                                                                                                                                                                                                                                                                                                                                                                                                                                                                                                                                                                                                                                                                                                                                                                                                                                                                                                                                                        |
| Date Submitted by the Author: | 10-Feb-2020                                                                                                                                                                                                                                                                                                                                                                                                                                                                                                                                                                                                                                                                                                                                                                                                                                                                                                                                                                                                                                     |
| Complete List of Authors:     | Danner, Marion; University Hospital Schleswig-Holstein - Campus Kiel, SHARE TO CARE Team, Department of General Pediatrics<br>Geiger, Friedemann; University Hospital Schleswig-Holstein - Campus Kiel, SHARE TO CARE Team, Department of General Pediatrics<br>Wehkamp, Kai; University Hospital Schleswig-Holstein - Campus Kiel, SHARE TO CARE Team, Department of General Pediatrics<br>Rueffer, Jens Ulrich; TAKEPART Media & Sciences GmbH<br>Kuch, Christine; University Hospital Schleswig-Holstein - Campus Kiel, SHARE TO CARE Team, Department of General Pediatrics<br>Sundmacher, L; Ludwig-Maximilians-Universitat Munchen<br>Skjelbakken, T; Universitetet i Tromso Helsevitenskapelige fakultet Helsefak,<br>Rummer, Anne; University Hospital Schleswig-Holstein - Campus Kiel, SHARE TO CARE Team, Department of General Pediatrics<br>Novelli, Anna; Ludwig-Maximilians-Universitat Munchen<br>Scheibler, Fuloep; University Hospital Schleswig-Holstein - Campus Kiel, SHARE TO CARE Team, Department of General Pediatrics |
| Keywords:                     | Change management < HEALTH SERVICES ADMINISTRATION & MANAGEMENT, Organisational development < HEALTH SERVICES ADMINISTRATION & MANAGEMENT, Organisation of health services < HEALTH SERVICES ADMINISTRATION & MANAGEMENT, Quality in health care < HEALTH SERVICES ADMINISTRATION & MANAGEMENT                                                                                                                                                                                                                                                                                                                                                                                                                                                                                                                                                                                                                                                                                                                                                  |
|                               |                                                                                                                                                                                                                                                                                                                                                                                                                                                                                                                                                                                                                                                                                                                                                                                                                                                                                                                                                                                                                                                 |

SCHOLARONE™  
Manuscripts

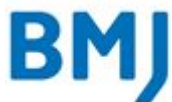

I, the Submitting Author has the right to grant and does grant on behalf of all authors of the Work (as defined in the below author licence), an exclusive licence and/or a non-exclusive licence for contributions from authors who are: i) UK Crown employees; ii) where BMJ has agreed a CC-BY licence shall apply, and/or iii) in accordance with the terms applicable for US Federal Government officers or employees acting as part of their official duties; on a worldwide, perpetual, irrevocable, royalty-free basis to BMJ Publishing Group Ltd ("BMJ") its licensees and where the relevant Journal is co-owned by BMJ to the co-owners of the Journal, to publish the Work in this journal and any other BMJ products and to exploit all rights, as set out in our [licence](#).

The Submitting Author accepts and understands that any supply made under these terms is made by BMJ to the Submitting Author unless you are acting as an employee on behalf of your employer or a postgraduate student of an affiliated institution which is paying any applicable article publishing charge ("APC") for Open Access articles. Where the Submitting Author wishes to make the Work available on an Open Access basis (and intends to pay the relevant APC), the terms of reuse of such Open Access shall be governed by a Creative Commons licence – details of these licences and which [Creative Commons](#) licence will apply to this Work are set out in our licence referred to above.

Other than as permitted in any relevant BMJ Author's Self Archiving Policies, I confirm this Work has not been accepted for publication elsewhere, is not being considered for publication elsewhere and does not duplicate material already published. I confirm all authors consent to publication of this Work and authorise the granting of this licence.

1  
2  
3  
4  
5  
6  
7  
8  
9  
10  
11  
12  
13  
14  
15  
16  
17  
18  
19  
20  
21  
22  
23  
24  
25  
26  
27  
28  
29  
30  
31  
32  
33  
34  
35  
36  
37  
38  
39  
40  
41  
42  
43  
44  
45  
46  
47  
48  
49  
50  
51  
52  
53  
54  
55  
56  
57  
58  
59  
60

# 1 TITLE PAGE

## 2 Making Shared Decision Making (SDM) a Reality: protocol of a full SDM implementation program 3 at a Northern German University Hospital

4 **Running title:** Protocol of a full SDM implementation program

5 Marion Danner<sup>1</sup>, Friedemann Geiger<sup>1</sup>, Kai Wehkamp<sup>1</sup>, Jens Ulrich Ruffer<sup>2</sup>, Christine Kuch<sup>1</sup>, Leonie  
6 Sundmacher<sup>3</sup>, Tove Skjelbakken<sup>4</sup>, Anne Rummer<sup>1</sup>, Anna Novelli<sup>3</sup>, Fuloep Scheibler<sup>1</sup> on behalf of the  
7 SHARE TO CARE (S2C) Project Team

### 9 **Affiliations:**

10 <sup>1</sup> University Hospital Schleswig-Holstein, SHARE TO CARE Team, Department of General Pediatrics,  
11 Kiel, Germany

12 <sup>2</sup> TAKEPART Media & Sciences GmbH, Cologne, Germany

13 <sup>3</sup> Ludwig-Maximilians-Universität (LMU), Munich, Germany

14 <sup>4</sup> University Hospital North-Norway, Tromsø, Norway

### 16 **Corresponding author:**

17 Marion Danner, Sonderprojekt Shared Decision Making, Projektstandort Köln

18 Maria-Hilf-Straße 15

19 50677 Köln

20 Phone: +49 (0)221-29257-663

21 Email: marion.danner@uksh.de

1  
2  
3  
4  
5  
6  
7  
8  
9  
10  
11  
12  
13  
14  
15  
16  
17  
18  
19  
20  
21  
22  
23  
24  
25  
26  
27  
28  
29  
30  
31  
32  
33  
34  
35  
36  
37  
38  
39  
40  
41  
42  
43  
44  
45  
46  
47  
48  
49  
50  
51  
52  
53  
54  
55  
56  
57  
58  
59  
60

1  
2  
3  
4  
5  
6  
7

**Article type:** Protocol Publication

**Maximum words:** 4000 words (not including title page, abstract, references, tables or figure legends).

**Current word count:** 3995 words

For peer review only

## 1 ABSTRACT

2 **Introduction:** Shared Decision Making (SDM) is not yet the standard way to make decisions in German  
3 hospitals. Making SDM a reality is a complex task. It involves training health care professionals in SDM  
4 communication and enabling patients to actively participate in communication, in addition to providing  
5 sound, easy to understand information on treatment alternatives in the form of evidence-based patient  
6 decision aids (EbPDAs). SDM needs to be designed together with relevant stakeholders to make  
7 implementation a simultaneous reality. This project funded by the German Innovation Fund aims at  
8 designing, implementing, and evaluating a multicomponent, large-scale and integrative SDM program -  
9 called SHARE TO CARE (S2C) - at all departments of a University Hospital Campus in Northern  
10 Germany within a 4 year time period.

11 **Methods and Analysis:** S2C tackles the above mentioned components of SDM at a time: (1) training  
12 clinicians in SDM communication (2) activating and empowering patients (3) developing EbPDAs in the  
13 most common/relevant diseases, and (4) training health care professionals in SDM coaching. S2C is  
14 designed together with patients and providers. The clinician training program is based on an online and a  
15 brief in situ training module. The decision coach training is based on a similar but less comprehensive  
16 approach. The development of online EbPDAs follows the International Patient Decision Aid Standards  
17 (IPDAS) and includes written, graphical and video-based information. Validated outcomes of SDM  
18 implementation are measured in a pre-post-intervention evaluation design. Health economic impact of the  
19 intervention is investigated using a propensity-score approach based on SDM-sensitive hospital cases.

20 **Ethics and Dissemination:** Ethics committee review approval has been obtained from Medical Ethics  
21 Committee of the Medical Faculty of the Christian Albrecht University (CAU) Kiel. Project information  
22 and results will be disseminated at conferences, on project-hosted websites at UKSH and by S2C and in  
23 peer-reviewed and professional journals.

1  
2  
3  
4  
5  
6  
7  
8  
9  
10  
11  
12  
13  
14  
15  
16  
17  
18  
19  
20  
21  
22  
23  
24  
25  
26  
27  
28  
29  
30  
31  
32  
33  
34  
35  
36  
37  
38  
39  
40  
41  
42  
43  
44  
45  
46  
47  
48  
49  
50  
51  
52  
53  
54  
55  
56  
57  
58  
59  
60

- 1   **KEYWORDS (max. 6):** Shared Decision Making (SDM), SDM training, Evidence-based Patient
- 2   Decision Aid (EbPDA), patient activation, decision coaching

For peer review only

## 1 STRENGTHS AND LIMITATIONS

- 2 • This study is the first full implementation of SDM in an entire University Hospital setting  
3 involving all stakeholders in patient care at a time.
- 4 • This study aims to make any patient encounter at the UKSH a better, more informed and more  
5 appreciating experience to patients and their clinicians.
- 6 • Project implementation is based on sound strategies and highly professional EBPDA  
7 development, training and implementation teams, but implementation barriers are nevertheless  
8 expected to be manifold in a busy and primarily profit-oriented hospital setting.
- 9 • A clear limitation of the study is that clinicians' and patients' contribution is not mandatory and  
10 there is no financial remuneration planned for their contribution.
- 11 • A clear advantage, however, is that patients are involved at several stages of the project and it is  
12 known from previous research that involving patients makes interventions more feasible and  
13 improves their quality.
- 14 • It might be initially very difficult to convince clinicians of how they will profit from more SDM  
15 in daily patient communication.



## 1 INTRODUCTION

2 Shared Decision Making (SDM) between clinician and patient is currently no standard in German  
3 hospitals. (1, 2) SDM has rather been implemented sporadically in individual indications and health care  
4 settings. (3, 4) This lack of SDM in routine settings might be due to a range of provider, patient,  
5 organizational, economic, and/or contextual factors. (1, 2, 5) On the other hand, German legislation with  
6 the Patients' Rights Act in 2013 gave SDM and the patient a more prominent role in German health care.  
7 (6) The act implies that clinicians and patients follow SDM communication rules in preference-sensitive  
8 treatment situations. For example, clinicians have to comprehensively inform their patients about relevant  
9 treatment alternatives (§630e). (6) In this context, the law also points out that written material like patient  
10 decision aids might support the clinician in meeting these legal requirements. While legislation in  
11 Germany therefore seems to be ready for SDM and supporting instruments such as evidence-based Patient  
12 Decision Aids (EbPDAs), daily practice is not or not yet routinely implementing it.

13 For SDM to be effective, the patients' and the health care providers' ability and willingness to participate  
14 in SDM are crucial. (2, 7) To make SDM a reality in any health care setting is an ambitious endeavor and  
15 a complex multi-level task. (5) It involves training clinicians and other health care staff in SDM  
16 communication skills as well as enabling and motivating patients to actively participate in  
17 communication, in addition to providing evidence-based, easy to understand information on treatment  
18 alternatives to patients and their doctors. (8) To be effective in daily practice, SDM also should be co-  
19 designed with all involved stakeholders to gain acceptance and recognition. (3) It needs an inner (i.e.,  
20 within the institution that wants to do SDM) and an outer (concerning the external conditions in which the  
21 institution works) setting, in which program implementation is possible – as defined e.g. by the  
22 Consolidated Framework for Implementation Research (CFIR). (9) The Norwegian approach (DA factory  
23 of the University Hospital North Norway), in which researchers and developers of SDM components –  
24 so-called “knowledge producers” - work in close cooperation with the clinicians and patients – so-called  
25 “knowledge users” – strongly inspired implementation processes in this project. (10)

1 Individual components of SDM such as SDM training for health care professionals, complex patient  
2 activation/empowerment programs or decision aids have all been previously tested in specific indications,  
3 populations and using different study designs. (11-15) For each component, effectiveness and impact on  
4 decision processes have been assessed. For example, according to a recent systematic review of 115 RCT  
5 with about 35.000 patients altogether, the use of only EbpDAs to inform patients in specific indications  
6 led to improved health education/literacy, more active participation and value congruent choices, more  
7 accurate expectations regarding course of disease and risk perceptions, more treatment satisfaction and  
8 better adherence to treatment. (14) This finding has been reinforced by reviews in other specific  
9 populations. (16) However, most of the EbpDAs previously tested in RCTs are not subsequently used in  
10 the settings they were developed in. (3) A recent study therefore concluded that “To improve subsequent  
11 use, researchers should codesign EbpDAs with end users to ensure fit with clinical practice and develop  
12 an implementation plan”. (3) In this study, the lack of clinicians supporting and agreeing with the DAs  
13 hindered successful implementation. Training clinicians in SDM in theory and practice has equally  
14 demonstrated to be effective in some settings and to some degree, but the certainty of this evidence is low  
15 and limited to specific treatment settings. (15, 17-19) While there may still be a lack of evidence  
16 regarding the effectiveness of SDM on patient-relevant clinical endpoints, there is growing agreement and  
17 consensus that SDM is a necessity, a patients’ and a citizen’s right, and an ethical imperative. (7)

18 While individual SDM components might be effective to a more or lesser degree, it has become clear that  
19 effectiveness to a large extent will depend on effective implementation strategies and consistent  
20 stakeholder involvement. (3, 5) No program until now has addressed the simultaneous implementation of  
21 a range of SDM components at the same time. Therefore, in this publicly funded project the objective was  
22 to design, implement and evaluate a multicomponent, large-scale and integrative SDM program - called  
23 SHARE TO CARE (S2C) - at the University Hospital Medical Center Schleswig Holstein (UKSH),  
24 Campus Kiel, within a 4 year time period - from October 2017 until September 30, 2021. The project is

1 designed and implemented in cooperation between the UKSH, Kiel, Germany, and the University  
2 Hospital of Northern Norway, Tromsø, Norway.

## 3 **METHODS AND ANALYSIS**

### 4 **Study design**

5 This study implies the full implementation of SDM at the University Hospital Campus Kiel within a 4  
6 year time period based on the S2C intervention program. It also implies a comprehensive evaluation,  
7 which will include (1) measuring the SDM level based on patients' and external observers' perceptions  
8 before and after S2C implementation and (2) measuring the impact of the S2C intervention on health care  
9 use and costs in comparison to a propensity-score matched comparison population not exposed to S2C.

10 The term "multicomponent" in the S2C program refers to four different interventions (components)  
11 designed and implemented simultaneously in individual clinics. This includes SDM training for  
12 clinicians, SDM qualification as "decision coach" for other health care staff like nurses or  
13 physiotherapists, a program that aims at patient activation and empowerment, and development of online  
14 EbPDAs. These components and the respective S2C project teams are depicted in Figure 1.

15 *Insert here: Figure 1*

16 The term "large-scale" means that the program will sequentially be implemented at the UKSH Campus in  
17 Kiel involving all 27 clinics with more than 650 clinicians. 83 EbPDAs will be developed - contacting  
18 new clinics every 6 months and identifying between one and eight EbPDA topics at each clinic in  
19 collaboration with the clinicians (Figure 2). At the same time, each clinician in the respective clinic has to  
20 undergo SDM training. A clinic-based patient activation program is implemented simultaneously. In  
21 addition, in selected clinics up to 150 decision coaches will be trained to facilitate EbPDA use in specific  
22 patient target groups.

23 *Insert here: Figure 2*

1 The term “integrative” in S2C means that from the very beginning, patients and clinicians will be actively  
2 involved in the decision aid structure and content generation inspired by the DA factory approach (10).  
3 The integrative approach begins with identifying new topics together with the clinicians as well as doing  
4 needs assessments with patients for each EbPDA topic. It follows through the program and ends with  
5 having clinicians do the final review and distribution of the decision aids in their clinic. Sample patients  
6 will also user-test the EbPDAs before being used in daily practice.

### 7 **Patient and Public Involvement**

8 No patient was involved in the development or design of this study.

### 9 **Theoretical Framework**

10 The S2C program is designed and implemented on the grounds of the Theory of Planned Behavior  
11 suggesting behavior is a result of motivation (intention) and ability (perceived behavior control) (20, 21).

12 The S2C program accordingly aims to induce attitude and perception-changes by training clinicians and  
13 other health care providers in SDM and by informing patients to enable simultaneous behavior change at  
14 the level of patients and health care providers at UKSH. The implementation of the S2C program and  
15 respective evaluation strategies are guided by the concept of Normalization Process Theory (NPT). The  
16 four components of the NPT are coherence (does the program make sense to those who are involved?),  
17 participation (how do relevant stakeholders participate in implementation?), collective action (what to do  
18 to make implementation successful?) and reflexive monitoring (how do the involved individuals judge  
19 implementation processes?). (22) As part of a complementary formative evaluation, these  
20 questions/constructs will be addressed with key stakeholders at specific points in time throughout the 4  
21 year project time to continuously monitor implementation processes.

22 The complexity of this project is documented using the implementation criteria of the Consolidated  
23 Framework for Implementation Research (CFIR) (<https://cfirguide.org/>). This framework comprises five  
24 domains (intervention characteristics, outer setting, inner setting, characteristics of individuals, and

1 process) and 39 related constructs. (9, 29, 30) CFIR helped to better structure planning and  
2 implementation needs in the early stages of project development. An outline of the program and its  
3 components was transferred into a CFIR format and is provided in Table 1. CFIR provides constructs that  
4 are used to address the five domains of each intervention included in the implementation program: its  
5 characteristics, the outer setting of the intervention, the inner setting if the institution that hosts the  
6 program, characteristics of individuals involved in each intervention and processes related to the  
7 interventions.

8 *Insert somewhere here: Table 1.*

### 9 **Setting and Study population**

10 Campus Kiel as part of the UKSH Medical Center is a tertiary care hospital with more than 200.000 cases  
11 each year. 27 clinics with more than 650 clinicians and more than 150 decision coaches in other  
12 professions will be part of either training modules or development and use of decision aids or both. Health  
13 professionals will be sequentially enrolled in the study each time new clinics are started, which happens  
14 in 6 month cycles (Figure 2). Since clinicians are requested to get involved in DA topic generation, there  
15 will be one responsible SDM clinician coordinating SDM activities in the clinic and one to three  
16 clinicians will be responsible for each selected topic.

### 17 **S2C Intervention components**

#### 18 *Intervention “SDM training for clinicians”*

19 This module aims to provide structured SDM training in three steps to a minimum of 80 % of clinicians  
20 working at the UKSH (i.e., at least 500 clinicians should receive training). The module is based on a  
21 pretested and validated training approach that has previously been demonstrated to be effective and lead  
22 to an increased patient, clinician and observer perception of involvement in decision making. (17, 18)  
23 Preceding training sessions, each clinician has to first take a baseline video of him or herself in a typical  
24 patient-clinician decision making interaction. The clinicians then undergo an online video tutorial which

1 contains general information on SDM and its application in clinical practice. It also contains fictional  
2 interactions between clinician and patient actors teaching clinicians to differentiate “good” from “bad”  
3 SDM communication. For the subsequent video-based small group training sessions, the baseline  
4 videotape and a second videotape of a patient-physician interaction (following online training) are rated  
5 by the S2C trainer team for their SDM suitability using an SDM evaluation criteria catalogue. In  
6 subsequent group discussion each clinician receives video-based trainer and group feedback. The aim of  
7 the group sessions is to provide an interactive and common SDM learning experience. To increase  
8 clinicians’ motivation to participate in training sessions, their participation is rewarded by continued  
9 medical education credits by the German Medical Associations.

#### 10 *Intervention “Activation of patients”*

11 The “Ask 3 questions” program has originally been developed and tested in Australia. (31, 32) The  
12 patients are instructed and motivated to actively participate in communication by asking their doctors  
13 questions regarding the specific treatment situation. This concept is the basis for activation of patients in  
14 the S2C project communicating the message “Ask three questions - decide together” using various  
15 distribution channels: paper postcards, posters/stand-up displays at the clinics, screen-based messages  
16 inside UKSH. It will be embedded in several other interventions, like a patient homepage within the  
17 UKSH-homepage, information screens and special SDM-days in the central lobby, a bedside infotainment  
18 system and other awareness interventions.

#### 19 *Intervention “(Online) Evidence-Based Patient Decision Aids (EbPDAs)”*

20 83 Online EbPDAs will be developed in all clinics at UKSH within the four year project time. Inspired by  
21 the DA factory approach, implementation starts with the identification of topics for EbPDAs together  
22 with clinicians. Relevant topics should be important for clinicians, involve at least two preference-  
23 sensitive treatment alternatives and ideally occur frequently. Each topic is then specified by defining the  
24 target population for the EbPDA (in-/exclusion criteria), the relevant treatment options, and potential

1 outcomes of each treatment. Topic specification is done based on preliminary searches of the literature,  
2 review of national and international guidelines, and in continuous exchange with the responsible  
3 clinician(s). Once a topic is specified, needs assessments are done with about 4-8 patients per topic to  
4 gather information on sensitive disease-, treatment- or outcome-related issues. This information is used to  
5 guide and structure DAs and to develop patient questions that are answered as part of the EbPDA.  
6 Development of EbPDAs involves a systematic search and assessment of best available evidence for all  
7 relevant interventions, focusing on systematic reviews and evidence-based clinical practice guidelines.  
8 The methods are based on the German standards of evidence-based patient information and the methods  
9 of evidence generation in patient information. (33, 34) Text information on the disease and the pros and  
10 cons of treatment will be accompanied by video sequences that are done with UKSH clinicians and  
11 patients. In these sequences clinicians will explain treatments and patients will share their experience in  
12 decision making with other patients. The latter is to motivate users of the online DAs to actively  
13 participate in decision-making. To avoid bias by testimonials, patients do not rate the different  
14 interventions in their video sequences but limit themselves to talking about their experience with the  
15 disease and their individual decision process. The entire process of DA development follows the  
16 International Patient Decision Aids Standards (IPDAS) criteria ([www.ipdas.ohri.ca](http://www.ipdas.ohri.ca) (26, 27)) and will  
17 undergo external review.

#### 18 *Intervention “Qualification of Decision coaches”*

19 This qualification module provides SDM training to about 150 nurses or other health care professionals in  
20 specific preference-sensitive indications, where patients most likely will need support in using EbPDAs.  
21 Training principles are based on previous research and decision coaching application in specific settings.  
22 (12, 13, 24, 35) The goal is to train health care staff like nurses or physiotherapists to act as “decision  
23 coaches” for their patients when using EbPDAs, i.e., to simultaneously provide emotional, psychological  
24 and technical support. The qualification consists of two workshop days communicating the principles of  
25 SDM and EbPDAs and including two individual decision coaching sessions for each participant. As for

1 the clinician training, each decision coach will be asked to videotape a coaching communication with a  
2 patient twice and each time will receive individual SDM trainer feedback.

### 3 **Study Outcomes**

4 To cover different perspectives, one primary outcome providing the patient perspective and one providing  
5 an observer-based perspective on the S2C intervention effect will be assessed. The first is based on a  
6 validated SDM measurement instrument, the Patient Involvement in Care Scales (PICS). (36, 37) It is a  
7 patient-reported outcome instrument and consists of three subscales. The subscales are (1) patient  
8 activation by doctors, (2) active information seeking behavior and (3) perceived patient participation in  
9 decision making. Each item is measured on a scale from 1 = „do not agree at all“ to 4 = „totally agree“.

10 The second primary outcome consists in an observer rating of patient-clinician interaction before and after  
11 intervention, using the MAPPIN'SDM-O-dyad instrument. (17, 18, 23) MAPPIN'SDM-O-dyad measures  
12 the degree of SDM performance realized by the doctor-patient dyad (i.e., by the unit made up of patient  
13 and clinician) as rated by independent observers. The instrument consists of 9 items assessing the process  
14 and quality of SDM. Each item is scored from “0” (“the indicator is not present”) to “4” (“the indicator is  
15 present at an excellent standard”). The observer ratings are provided by independent but trained raters  
16 who rate videotapes of patient-clinician-interactions before and after the intervention (see data collection).  
17 All observers are blinded to the measurement objects and time points of video recordings.

18 Additional secondary outcomes assessing patient-clinician-interaction from the patient perspective are  
19 based on two validated and widely-used questionnaires, the Preparation for Decision Making Scale  
20 (PrepDM: 10 items; 5-point scale) (38) and collaboRATE (39) (3 items; 5-point scale). All patient-  
21 reported outcome instruments will be administered to patients at the scheduled points in time within a  
22 combined patient questionnaire.



## 1 **Data collection and analysis plan**

2 The first part consists of a pre-post data collection within UKSH assessing SDM implementation from the  
3 patient (PICS/patient questionnaire assessments) and the observer perspective (MAPPIN'SDM-O-dyad  
4 assessments). The second part consists of a health economic evaluation comparing UKSH patient data  
5 following the S2C intervention to a propensity-score matched insurance-based comparison group  
6 regarding use of specific health care services and costs. A complementary formative evaluation of  
7 implementation processes within UKSH using structured qualitative interviewing techniques is planned.

8 The data collection and evaluation schedule is depicted in Figure 3.

9 *Insert here: Figure 3*

## 10 **Patient-based S2C evaluation**

11 Patient questionnaires are administered to patients at three points in time throughout the 4 year study  
12 period. The first measurement ( $T_0$ ) is scheduled at study initiation and is based on the entire UKSH  
13 campus population. The second measurement ( $T_1$ ) is taken after completion of the S2C intervention at  
14 each individual clinic to assess immediate intervention effect. The intervention is considered complete at  
15 the clinic level when at least 80% of clinicians have undergone training, clinic-specific EbPDAs are  
16 developed and in use, and the patient activation program is in place. The last campus-level measurement  
17 ( $T_2$ ) is scheduled at study completion. It aims to appraise the sustainability of the S2C intervention.

18 The patient questionnaire is mailed to 1600 randomly selected patients that were hospitalized within the  
19 preceding weeks at each of the three measurement time points with a return envelope included in each  
20 mailing. Patients who do not return the questionnaire within a 2 or 4 week time frame, respectively, will  
21 get a reminder either once or twice. Using this procedure based on the Total Design Method approach by  
22 Dillmann et al. (40)., final response rates of at least 60% are expected.

1  
2  
3 1 It is hypothesized that the measured pre-post intervention effect, i.e., the mean difference in PICS patient  
4  
5 2 involvement scale score, is significant (with  $\alpha=0.05$ ) and relevant (considered relevant if Hedges  $g > 0.5$  –  
6  
7 3 which is considered a medium size effect). If the distribution doesn't allow the assumption of normality,  
8  
9 4 appropriate non-parametric tests will be applied in the data analysis.

### 5 **Observer based SDM (S2C) evaluation**

6 The observer assessment via MAPPIN'SDM-O-dyad is performed twice throughout the 4 year study  
7  
8 7 period. It is once performed directly before the intervention and once following completion of the  
9  
10 8 intervention in each clinic as defined above. To minimize workload for UKSH clinicians, who have to  
11  
12 9 videotape encounters with patients to facilitate the MAPPIN'SDM-O-dyad evaluation, these assessments  
13  
14 10 will be limited to specific clinical entities. Clinical entities will include surgery, internal medicine,  
15  
16 11 radiotherapy, oncology, orthopedics, and gynecology.

17  
18 12 It is hypothesized that in 80% of patient-clinician-interactions patients will receive satisfactory SDM  
19  
20 13 treatment at the second clinic-wide measurement ( $T_1$ ). To answer the latter study hypothesis, a Mappin-  
21  
22 14 SDM-O-dyad mean value of greater or equal to 1.5 was defined as satisfactory basic patient involvement  
23  
24 15 in decision making based on previous validation research. (18)

### 16 **Sample size calculation**

17 Sample size calculation for the patient-based primary outcome is based on previously published PICS  
18  
19 18 data. (37, 41) An assumed difference of 0.4 in the PICS outcome at  $T_1$  vs.  $T_0$  and an assumed standard  
20  
21 19 deviation of 0.7 yields a sample size of about 40 for each group/clinic at each measurement (assuming a  
22  
23 20 power of 80% and a level of significance of 5%, (one-sided, assuming positive effect). A presumed  
24  
25 21 response rate of 60% to the patient questionnaire mailings leads us to target about 1600 patients at each  
26  
27 22 measurement point ( $T_0$ ,  $T_1$ ,  $T_2$ ) to finally have at least about 950 to 1000 patient questionnaires returned,  
28  
29 23 yielding on average between 30-60 returned questionnaires per clinic. These numbers will allow to  
30  
31 24 measure significant differences in the primary endpoint not only at the campus but also at the individual

1 clinic level (at least in the larger clinics). For the primary observer-based outcome (Mappin'SDM) no  
2 sample size calculation is needed since no changes in effect are measured. Instead, our objective is to  
3 reach a satisfying level of SDM in more than 80% of patients undergoing evaluation. Sample size is given  
4 by number of clinicians at each involved clinic, and will be 200 to 240 in total. This includes general  
5 surgery (n=34 clinicians), internal medicine (n=62), radiotherapy (n=16), oncology (n=21), orthopedics  
6 (n=27), gynecology (N=34), and urology (N=13).

### 7 **Health Economic Evaluation**

8 In addition to the pre-post SDM evaluation, an economic evaluation will be conducted. This analysis will  
9 be based on insurance claims data provided by the largest German Health Insurance provider (Techniker  
10 Krankenkasse (TK)). In Germany, approximately 86 % of the population is covered under the  
11 comprehensive statutory health insurance system. The TK provides health insurance for approximately  
12 9.8 million people and routinely collects data for reimbursement purposes on hospital stays, clinician  
13 visits, medical procedures, medication and medical diagnoses. In the economic evaluation, incremental  
14 costs and use of specific services of patients admitted to the UKSH with preference-sensitive conditions  
15 (intervention group) will be compared to a matched population (control group) drawn from the  
16 administrative dataset from the TK. The control group includes patients with a hospital admission to  
17 another German University or Educational hospital. From this sample population, patients will be  
18 matched to the intervention group using exact matching, propensity score matching or a combination of  
19 exact and propensity score matching. (42, 43) Matching criteria will include patient characteristics like  
20 age and sex, the main diagnosis of the hospital admission as well as measures of morbidity within 12  
21 months preceding hospital admission. In line with previous research (28), variables that are compared  
22 across groups include preference-sensitive surgery rates, imaging rates, inpatient costs, total medical costs  
23 and hospital and emergency department admissions within 12 months after the admission to the hospital.  
24 To account for systematic differences between intervention and control group, the analysis will focus on  
25 the comparison of the difference in outcomes measured at two points in time, before and after the

1 implementation of the SDM intervention. The analysis will be limited to about 10 to 15 frequently  
2 occurring and preference-sensitive conditions. These conditions will include but are not limited to  
3 cardiologic diseases, benign prostatic hyperplasia and other urologic diseases, benign uterine diseases and  
4 obstetrics, neurosurgery / back pain, and orthopaedic diseases such as knee or hip replacement.

### 5 **Complementary Formative Assessment**

6 Complementary assessment of the implementation processes will be based on the NPT theory. In specific,  
7 the NoMAD construct based on NPT will guide us in the design of respective formative qualitative  
8 assessment elements. (44-46)

### 9 **Implementation**

10 The intervention implementation strategy is based on the theoretical constructs of PBT and NPT as well  
11 as inspired by the Norwegian DA factory concept. It aims to produce a strong identification of the users  
12 with the final SDM products by engaging them early on in the development and application of  
13 interventions. A professional implementation team consisting of clinicians from UKSH, psychologists  
14 and health scientists will engage in activities to promote S2C in the clinic as wells as to support and  
15 monitor implementation progress (eg. scheduling and reminding clinicians of training appoinments, using  
16 Scorecards to document project progress, providing regular feedback to clinicians on DA development  
17 and use). The NPT construct is used to instruments assessing implementation progress throughout the  
18 project. The CFIR is used to consistently follow-up on and document implementation in a structured way  
19 (Table 1).

### 20 **ETHICS AND DISSEMINATION**

21 The Medical Ethics Committee of the Medical Faculty of the Christian Albrecht University (CAU) Kiel  
22 has provided ethics approval to this study (reference number A111/18). This study will be conducted in  
23 accordance with German laws and regulations of the Medical Ethics Committee of the CAU, Kiel,  
24 Germany. Eligible patients or health care providers will be fully informed about the study and asked to

1  
2  
3 1 participate in each part of the study: conducting personal interviews with patients (needs assessment), or  
4  
5 2 video sequences with clinicians/patients, or involving clinicians in training sessions. Patients/providers  
6  
7 3 will receive a respective information letter and will be informed about the implications of participation.  
8  
9 4 They will have sufficient opportunity to ask questions and to consider the implications of the study before  
10  
11 5 deciding to participate. Before participation, all individuals will provide written informed consent,  
12  
13 6 compliant with the local and ethical data regulations. Patients will be allowed to withdraw from the study  
14  
15 7 without giving a reason, at any time. The results arising from this implementation study will be presented  
16  
17 8 at scientific meetings, on project-hosted websites at UKSH and by S2C, and published in peer-reviewed  
18  
19 9 journals. There is no intention to use professional writers and authorship will be based on the  
20  
21 10 International Committee of Medical Journal Editors Guidelines.  
22  
23  
24  
25  
26  
27  
28  
29  
30  
31  
32  
33  
34  
35  
36  
37  
38  
39  
40  
41  
42  
43  
44  
45  
46  
47  
48  
49  
50  
51  
52  
53  
54  
55  
56  
57  
58  
59  
60

1 Table 1. Consolidated Framework for Implementation Research (CFIR), S2C project-specific information

| Construct                              |                             | Evidence-based Decision Aids*                                                                                                                                                                                                                                                                                                                                                                                                                                                                                                                                                                                                                                   | SDM Training for clinicians / Training program for “decision coaching/decision coaches”**                                                                                                                                                                                                                                                                                                                                                                                                                                                                                                                                                     |
|----------------------------------------|-----------------------------|-----------------------------------------------------------------------------------------------------------------------------------------------------------------------------------------------------------------------------------------------------------------------------------------------------------------------------------------------------------------------------------------------------------------------------------------------------------------------------------------------------------------------------------------------------------------------------------------------------------------------------------------------------------------|-----------------------------------------------------------------------------------------------------------------------------------------------------------------------------------------------------------------------------------------------------------------------------------------------------------------------------------------------------------------------------------------------------------------------------------------------------------------------------------------------------------------------------------------------------------------------------------------------------------------------------------------------|
| <b>I. INTERVENTION CHARACTERISTICS</b> |                             |                                                                                                                                                                                                                                                                                                                                                                                                                                                                                                                                                                                                                                                                 |                                                                                                                                                                                                                                                                                                                                                                                                                                                                                                                                                                                                                                               |
| A                                      | Intervention Source         | Online Evidence-based Patient Decision Aids (EbPDAs) are developed internally by the S2C project team. Topics for new EbPDAs are generated together with the clinicians at UKSH since the project is based on the principle that developers of EbPDAs (the S2C-team) work closely together with knowledge users, i.e., patients and clinicians. Patients are involved early on via needs assessments to inform EbPDA development. Evidence syntheses are conducted by well-known best-in class external consultant groups, namely EBSCO (producers of the DynaMed point in care services, well-known to UKSH clinicians) and Kleijnen Systematic Reviews (KSR). | The training program for clinicians was previously developed and validated by members of the S2C team (17, 18, 23).<br>The training program for „decision coaching“ is developed internally and specifically for the project by the S2C trainer team based on existing decision coaching programs (24, 25) and experience from the clinician training.<br>With a group of trained and experienced psychologists/coaching specialists, the trainer team combines scientific and practical expertise to excellently prepare different types of health care providers in SDM communication skills and in coaching patients in how to use EbPDAs. |
| B                                      | Evidence Strength & Quality | A current systematic review demonstrates that decision aids improve decision and indication quality (14). Our EbPDAs follow the International Patient Decision Aids Standards (IPDAS) (26, 27) and provide balanced and easy to understand information on the pros and cons of treatment alternatives to patients. With the Patients’ Rights Law in place in Germany since 2013, the S2C project with its EbPDAs also puts the patients’ right for balanced information into practice.                                                                                                                                                                          | The training program for clinicians was developed and validated by Geiger and Kasper et al. (17, 18, 23). This program guided the development of a new training program as decision coaches for other health care staff. Further evidence supported the refinement and adaptation of the coaching program to meet the specific demands in difficult indications/target populations in a hospital setting (24, 25).                                                                                                                                                                                                                            |
| C                                      | Relative Advantage          | The format of online EbPDAs with components like easy to understand written/graphical information, videos with patient narratives, and videos with clinicians from the UKSH explaining disease or treatment concept are likely attractive to patients and clinicians. While clinicians are involved in development and invest time into it, EbPDAs will facilitate better informed dialogue with patients. By providing more structure to the dialogue between patient and clinician, EbPDAs are expected to make communication more efficient (28).                                                                                                            | The online SDM training is a relatively quick and easy-to-do training program teaching SDM basics to clinicians. The video-feed-back based training is highly individualized and based on concrete patient-clinician communication allowing a thorough SDM learning experience. The training of decision coaches focuses on providing support with EbPDA use to patients. This may be helpful if patients are emotionally or physically not able to effectively use EbPDAs without support, e.g. elderly or if patients are emotionally or psychologically impaired.                                                                          |

|   |                            |                                                                                                                                                                                                                                                                                                                                                                                                                                                                                                                                                                                                                                                                                                                           |                                                                                                                                                                                                                                                                                                                                                                                                                                                                                                                                                                                                                                                                                                                      |
|---|----------------------------|---------------------------------------------------------------------------------------------------------------------------------------------------------------------------------------------------------------------------------------------------------------------------------------------------------------------------------------------------------------------------------------------------------------------------------------------------------------------------------------------------------------------------------------------------------------------------------------------------------------------------------------------------------------------------------------------------------------------------|----------------------------------------------------------------------------------------------------------------------------------------------------------------------------------------------------------------------------------------------------------------------------------------------------------------------------------------------------------------------------------------------------------------------------------------------------------------------------------------------------------------------------------------------------------------------------------------------------------------------------------------------------------------------------------------------------------------------|
| D | Adaptability               | <p>The format of the EbPDAs follows a standard structure. However, this structure is flexible enough to allow for topic- or clinic-specific adaptations. Each decision aid will contain a printable summary sheet on all relevant aspects of alternatives (Questions &amp; Answers-Sheet). This paper-based version can be used in communication with patients not willing or able to use the online EbPDAs.</p>                                                                                                                                                                                                                                                                                                          | <p>Training units are flexible and adaptable to specific demands. The online training can be easily integrated into a busy clinician schedule. If clinicians do not want to do personal training in a group setting, it can be done with clinicians individually. If health care providers are not willing to video-tape interactions with their patients, trainers may offer participating observation instead and rate “live” patient-physician interactions.</p>                                                                                                                                                                                                                                                  |
| E | Triability                 | <p>In each clinic, few EbPDAs will be initially developed. If a clinic is then willing and interested to support further topics, additional EbPDAs may be developed upon demand. If a clinic is rather unwilling to support the project, no pressure will be exerted but the clinic will be invited to rejoin EbPDA development at a later point in time. Also, since the clinics are approached in a stepwise approach, learnings from one clinic might be transferred to upcoming clinics.</p>                                                                                                                                                                                                                          | <p>It is not an imperative for UKSH staff to undergo SDM training sessions, but clinic directors are asked to motivate their staff to take part in these. Also, clinic directors are asked to make sure that training sessions can be done within working hours.</p> <p>As for the EbPDAs: if a clinic is unwilling to support the project at a specific point in time or to provide the time to their clinicians to undergo training, no further pressure will be exerted. In selected instances, SDM training might remain limited to online sessions.</p>                                                                                                                                                         |
| F | Complexity                 | <p>Patients will have to invest at least 30-40 minutes to go through one EbPDA. This might be tiring to some patients. The patient-friendly and flexible format of EbPDAs addresses this issue in parts. The “Infotainment”-system at UKSH and the availability of portable notebooks will make access to EbPDAs easy for patients in the hospital.</p> <p>Clinicians will have to invest time for EbPDAs. They might not in the first place realize that EbPDAs can support them and help save time in patient communication. Also, the clinics/clinicians will have to integrate the EbPDAs into patient pathways. This might not always be easy in a busy hospital setting and make pathway adaptations necessary.</p> | <p>Training sessions for clinicians and decision coaches are time-consuming, between 1-2 full days for clinicians and for those who undergo training as decision coaches.</p> <p>This time needs to be provided by clinic directors but it might still be difficult to integrate training sessions into a busy clinic schedule. Health care staff might refuse videotaping themselves in patient interaction for various reasons (e.g., worries about an external rating of their performance).</p> <p>Even for well trained clinicians or decision coaches, it might sometimes be difficult to integrate SDM and decision coaching into patient pathways and adaptations of treatment pathways might be needed.</p> |
| G | Design Quality & Packaging | <p>The EbPDA is developed by a highly professional S2C team of medical writers working according to the standards of evidence-based patient information and a professional film team with wide experience in patient filming. Evidence syntheses are done by best-in class external consultants together with the S2C evidence team. All EbPDAs strictly adhere to the IPDAS criteria (26, 27).</p>                                                                                                                                                                                                                                                                                                                       | <p>All training sessions were developed and are conducted by a group of trained and experienced psychologists/coaches.</p> <p>The online-training was developed and realized by the S2C trainer team in cooperation with the S2C film team and didactic support from external consultants. All training evaluations strictly adhere to the rating criteria of the Mapping-SDM questionnaire (18, 23)</p>                                                                                                                                                                                                                                                                                                             |

|                           |                              |                                                                                                                                                                                                                                                                                                                                                                                                                                                                                                                                                                                                                                                                                                                                 |                                                                                                                                                                                                                                                                                                                                                                                                                                                  |
|---------------------------|------------------------------|---------------------------------------------------------------------------------------------------------------------------------------------------------------------------------------------------------------------------------------------------------------------------------------------------------------------------------------------------------------------------------------------------------------------------------------------------------------------------------------------------------------------------------------------------------------------------------------------------------------------------------------------------------------------------------------------------------------------------------|--------------------------------------------------------------------------------------------------------------------------------------------------------------------------------------------------------------------------------------------------------------------------------------------------------------------------------------------------------------------------------------------------------------------------------------------------|
| H                         | Cost                         | Costs of the intervention and costs associated with implementation are covered by a grant of the German Innovation Fonds (IF). The IF is hosted by the German Federal Joint Committee. Opportunity costs will occur since patients and clinicians have to invest time in decision aid production and/or use. Research indicates that adding EbPDAs to patient-physician-interaction can make communication and decisions more effective and more efficient (14, 28)                                                                                                                                                                                                                                                             | As for the EbPDAs all costs related to the development of training sessions are covered by the IF. Furthermore, clinicians have to invest time into the different training sessions. Ideally, these can be done within their working hours. Clinicians will be rewarded by continued medical education credits by the German Medical Associations.<br>Health care staff undergoing training as decision coaches will need to invest 2 full days. |
| <b>II. OUTER SETTING</b>  |                              |                                                                                                                                                                                                                                                                                                                                                                                                                                                                                                                                                                                                                                                                                                                                 |                                                                                                                                                                                                                                                                                                                                                                                                                                                  |
| A                         | Patient Needs & Resources    | As primary cooperation partner in the S2C project, the administration of the UKSH acknowledges the need for better patient participation at UKSH and the resulting need for change. While the UKSH puts no formal pressure on its clinicians to cooperate in the project intervention, the directors of each clinic are asked to provide support (e.g., by having their staff undergo training sessions within working hours) and to motivate their clinicians support the S2C programj (e.g. participate in trainings or support EbPDA development)                                                                                                                                                                            |                                                                                                                                                                                                                                                                                                                                                                                                                                                  |
| B                         | Cosmopolitanism              | UKSH and the S2C project team work in close cooperation with other National and International players in the field of evidence-based Medicine and SDM. Cooperation is initiated with, e.g., the patient information group of the German Institute for Quality and Efficiency in Health Care (gesundheitsinformation.de) and the evidence-based guideline developers within the German Association of the Scientific Medical Societies (AWMF), primarily trying to avoid the redundant production of patient content or evidence reviews. At the International level, UKSH and the project team get engaged for example in the International Shared Decision Making (ISDM) Society and maintain relationships with its partners. |                                                                                                                                                                                                                                                                                                                                                                                                                                                  |
| C                         | PeerPressure                 | This is the first full implementation of SDM at a University Hospital in Germany (and likely worldwide).                                                                                                                                                                                                                                                                                                                                                                                                                                                                                                                                                                                                                        |                                                                                                                                                                                                                                                                                                                                                                                                                                                  |
| D                         | External Policy & Incentives | The objective of IF funded projects in Germany testing new forms of health care provision is to finally transfer these into statutory health insurance funding (in case of successful implementation). Therefore, the S2C project can be considered a “lighthouse” project, gaining a lot of attention in the media already. In the context of the Patients’ Rights Law and with SDM being a generally approved concept in German politics, this project aims to serve as a role model for other hospitals and settings. Cooperation with other National players (e.g. AWMF, IQWiG) aims to support this development towards more SDM-based patient care.                                                                       |                                                                                                                                                                                                                                                                                                                                                                                                                                                  |
| <b>III. INNER SETTING</b> |                              |                                                                                                                                                                                                                                                                                                                                                                                                                                                                                                                                                                                                                                                                                                                                 |                                                                                                                                                                                                                                                                                                                                                                                                                                                  |
| A                         | Structural Characteristics   | The UKSH is a tertiary care hospital with 27 primary clinics. Each of these clinics and all clinicians will be involved. Since the UKSH is very hierarchically structured, our approach is to get clinics involved in the project in a top-down approach. Clinic directors get involved first, followed by the clinicians at the next-lower levels in the hierarchy. One physician in each clinic will be chosen together with the director to be the designated “SDM responsible” who oversees activities in the respective clinic (e.g. training activities, EbPDA development, patient activation activities). Other clinicians will be responsible for individual EbPDA topics.                                             |                                                                                                                                                                                                                                                                                                                                                                                                                                                  |
| B                         | Networks & Communications    | At the level of clinicians, the hierarchical structures need to be respected and taken into account. If the director supports SDM, it is more likely that the entire clinic supports SDM. At the patient level, the UKSH offers the Infotainment system which can be used to make EbPDAs available to patients at the bedside.                                                                                                                                                                                                                                                                                                                                                                                                  |                                                                                                                                                                                                                                                                                                                                                                                                                                                  |



|    |                                           |                                                        |                                                                                                                                                                                                                                                                                                                                                                                                                                                                                                                                                                                                                                                                                                                                                                                                                                                                                                                                                                                                                         |
|----|-------------------------------------------|--------------------------------------------------------|-------------------------------------------------------------------------------------------------------------------------------------------------------------------------------------------------------------------------------------------------------------------------------------------------------------------------------------------------------------------------------------------------------------------------------------------------------------------------------------------------------------------------------------------------------------------------------------------------------------------------------------------------------------------------------------------------------------------------------------------------------------------------------------------------------------------------------------------------------------------------------------------------------------------------------------------------------------------------------------------------------------------------|
| 1  | D                                         | Implement-<br>ation<br>Climate                         | Our objective in this project is to initiate a paradigm shift towards more SDM-based health care in a hospital setting. While the UKSH is open for change at an administrative level, time and economic constraints might limit the clinicians' willingness and perceived liberty to support the project.<br><br>Implementation climate will be assessed using summative (Patient questionnaire; Mappin'SDM evaluation to assess SDM training success) and formative (based on NPT) evaluation components as described.                                                                                                                                                                                                                                                                                                                                                                                                                                                                                                 |
| 2  | E                                         | Readiness<br>for change                                | While the UKSH is open for change at an administrative level, time and economic constraints might limit the clinicians' willingness and perceived liberty to support the project.                                                                                                                                                                                                                                                                                                                                                                                                                                                                                                                                                                                                                                                                                                                                                                                                                                       |
| 3  | <b>IV. CHARACTERISTICS OF INDIVIDUALS</b> |                                                        |                                                                                                                                                                                                                                                                                                                                                                                                                                                                                                                                                                                                                                                                                                                                                                                                                                                                                                                                                                                                                         |
| 4  | A                                         | Knowledge<br>& Beliefs<br>about the<br>Intervention    | Preliminary research indicates that many patients in the UKSH setting might not yet be regularly involved in decisions about their own health, but are open to more information and more involvement. Individuals' attitudes toward the SDM interventions and their role in it will be measured in the pre-post evaluation by:<br><br><ul style="list-style-type: none"> <li>- Using a range of patient-based instruments to assess patient-physician interaction and the perceived role of the patient before and after the interventions.</li> <li>- Using the Mappin'SDM tool to get a reviewer perspective on whether interventions/trainings influence/improve patient-physician interaction.</li> </ul><br>Clinicians might often rather focus on the demands placed on them by the S2C project team and less the advantages in later patient communication. It is planned to use an NPT-based online survey tool to assess key stakeholder/clinician perceptions of the intervention throughout implementation . |
| 5  | <b>V. PROCESS</b>                         |                                                        |                                                                                                                                                                                                                                                                                                                                                                                                                                                                                                                                                                                                                                                                                                                                                                                                                                                                                                                                                                                                                         |
| 6  | A                                         | Planning                                               | The individual components of the S2C program have been tested/validated previously in other contexts and will be implemented by a team of implementation experts.                                                                                                                                                                                                                                                                                                                                                                                                                                                                                                                                                                                                                                                                                                                                                                                                                                                       |
| 7  | B                                         | Engaging                                               | The S2C team will engage in intervention realization at different levels (i.e. recruiting patients for needs assessments, discussing new topics with clinicians, providing support in case of problems etc.). Besides, these teams will realize patient activation and other marketing/exchange initiatives to foster engagement and identification with the S2C concept among patients and health care staff.                                                                                                                                                                                                                                                                                                                                                                                                                                                                                                                                                                                                          |
| 8  | 1                                         | Opinion<br>Leaders                                     | The directors of each clinic are important to actively support the S2C intervention and engage their clinicians to follow them. Also, the "SDM clinician" at each clinic plays a crucial role in this context.                                                                                                                                                                                                                                                                                                                                                                                                                                                                                                                                                                                                                                                                                                                                                                                                          |
| 9  | 2                                         | Formally<br>App.Internal<br>Implementati<br>on Leaders | One physician in each clinic will be the designated "SDM clinician" who oversees activities in the respective clinic. For each topic, one clinician or a group of clinicians will be nominated to carry primary responsibility from a clinical point of few.                                                                                                                                                                                                                                                                                                                                                                                                                                                                                                                                                                                                                                                                                                                                                            |
| 10 | 3                                         | Champions                                              | The "personal flagship" of the project, Dr. Eckhart von Hirschhausen, is a very prominent TV-physician, comedian and moderator. He will play a very active role in project marketing. He will be present in videos and on posters and demonstrate his support of the S2C program at all levels and in all its components. Dr. von Hirschhausen is also an official cooperation partner in the project.                                                                                                                                                                                                                                                                                                                                                                                                                                                                                                                                                                                                                  |
| 11 | C                                         | Executing                                              | The program is sponsored by the IF. This national sponsor requires regular milestone reports on project success every six months.                                                                                                                                                                                                                                                                                                                                                                                                                                                                                                                                                                                                                                                                                                                                                                                                                                                                                       |
| 12 | D                                         | Reflecting &<br>Evaluating                             | The individual teams (trainers, implementation team, evidence team, decision aid team) in the project will continuously report on the progress of implementing S2C in their respective domain and document issues, problems or highlights throughout the course of project time.                                                                                                                                                                                                                                                                                                                                                                                                                                                                                                                                                                                                                                                                                                                                        |

1  
2  
3 1 \*The intervention component “patient activation program” is not separately described in the CFIR table but in the publication  
4 2 text only, given that this program is limited to a marketing and information strategy within each clinic using postcards, posters  
5 3 and stand-up-boards.  
6  
7  
8  
9  
10  
11  
12  
13  
14  
15  
16  
17  
18  
19  
20  
21  
22  
23  
24  
25  
26  
27  
28  
29  
30  
31  
32  
33  
34  
35  
36  
37  
38  
39  
40  
41  
42  
43  
44  
45  
46  
47  
48  
49  
50  
51  
52  
53  
54  
55  
56  
57  
58  
59  
60

For peer review only

1  
2  
3  
4  
5  
6  
7  
8  
9  
10  
11  
12  
13  
14  
15  
16  
17  
18  
19  
20  
21  
22  
23  
24  
25  
26  
27  
28  
29  
30  
31  
32  
33  
34  
35  
36  
37  
38  
39  
40  
41  
42  
43  
44  
45  
46  
47  
48  
49  
50  
51  
52  
53  
54  
55  
56  
57  
58  
59  
60

1 **Legend of Figures:**

- 2 Figure 1. Project components and involved S2C teams
- 3 Figure 2. Sequential quarterly enrollment of new clinics over 4 year project time
- 4 Figure 3. Project stages and data collection schedule for SDM assessment

For peer review only

1  
2  
3 **1 Acknowledgements**  
4

5  
6 2 The authors acknowledge Juergen Kasper and Katrin Liethmann for their tremendous contributions to the  
7  
8 3 development of the study concept and intervention program.  
9

10  
11 **4 Authors' contributions**  
12

13  
14 5 FG, FS, KW and JR developed the study concept and methods, designed the intervention program and are  
15  
16 6 responsible for its implementation. LS and AM developed the evaluation concept and are responsible for  
17  
18 7 its realization. TS provided substantial scientific and methodological contribution. AR provided  
19  
20 8 methodological input and critically revised the manuscript. MD drafted the manuscript and provided  
21  
22 9 scientific and methodological input to the study concept.  
23

24  
25 **10 Funding**  
26

27  
28 11 This work was supported by a grant of the German Innovation Fonds (hosted by the Federal Joint  
29  
30 12 Committee), grant number 01NVF17009  
31

32  
33 **13 Competing Interests**  
34

35  
36 14 None declared  
37

38  
39 **15 Ethics Approval**  
40

41  
42 16 This study was approved by the Medical Ethics Committee of the Medical Faculty of the Christian  
43  
44 17 Albrecht University (CAU) Kiel, reference number A111/18  
45

46  
47  
48  
49  
50  
51  
52  
53  
54  
55  
56  
57  
58  
59  
60

18



- 1 11. Muller E, Strukava A, Scholl I, Harter M, Diouf NT, Legare F, et al. Strategies to evaluate healthcare  
2 provider trainings in shared decision-making (SDM): a systematic review of evaluation studies. *BMJ*  
3 *Open*. 2019;9(6):e026488.
- 4 12. Stacey D, Kryworuchko J, Bennett C, Murray MA, Mullan S, Legare F. Decision coaching to prepare  
5 patients for making health decisions: a systematic review of decision coaching in trials of patient  
6 decision AIDS. *Med Decis Making*. 2012;32(3):E22-33.
- 7 13. Stacey D, Kryworuchko J, Belkora J, Davison BJ, Durand MA, Eden KB, et al. Coaching and  
8 guidance with patient decision aids: A review of theoretical and empirical evidence. *BMC Med Inform*  
9 *Decis Mak*. 2013;13 Suppl 2:S11.
- 10 14. Stacey D, Legare F, Lewis K, Barry MJ, Bennett CL, Eden KB, et al. Decision aids for people facing  
11 health treatment or screening decisions. *Cochrane Database Syst Rev*. 2017;4:CD001431.
- 12 15. Legare F, Adekpedjou R, Stacey D, Turcotte S, Kryworuchko J, Graham ID, et al. Interventions for  
13 increasing the use of shared decision making by healthcare professionals. *Cochrane Database Syst*  
14 *Rev*. 2018;7:CD006732.
- 15 16. van Weert JC, van Munster BC, Sanders R, Spijker R, Hooft L, Jansen J. Decision aids to help older  
16 people make health decisions: a systematic review and meta-analysis. *BMC Med Inform Decis Mak*.  
17 2016;16:45.
- 18 17. Kasper J, Liethmann K, Heesen C, Reissmann DR, Geiger F. Training doctors briefly and in situ to  
19 involve their patients in making medical decisions-Preliminary testing of a newly developed module.  
20 *Health Expect*. 2017;20(6):1254-63.
- 21 18. Geiger F, Liethmann K, Reitz D, Galalae R, Kasper J. Efficacy of the doktormitSDM training module  
22 in supporting shared decision making - Results from a multicenter double-blind randomized controlled  
23 trial. *Patient Educ Couns*. 2017;100(12):2331-8.
- 24 19. Kienlin S, Kristiansen M, Ofstad E, Liethmann K, Geiger F, Joranger P, et al. Validation of the  
25 Norwegian version of MAPPIN'SDM, an observation-based instrument to measure shared decision-  
26 making in clinical encounters. *Patient Educ Couns*. 2017;100(3):534-41.
- 27 20. Aijzen I. The Theory of Planned Behavior. *Organ Behavi Hum Decis Process* 1991;50:179-211.
- 28 21. Fishbein M. A reasoned action approach to health promotion. *Med Decis Making*. 2008;28(6):834-44.
- 29 22. May CR, Finch T, Ballini L, MacFarlane A, Mair F, Murray E, et al. Evaluating complex interventions  
30 and health technologies using normalization process theory: development of a simplified approach and  
31 web-enabled toolkit. *BMC Health Serv Res*. 2011;11:245.

- 1  
2  
3 1 23.Geiger F, Liethmann K, Hoffmann F, Paschedag J, Kasper J. Investigating a training supporting  
4 Shared Decision Making (IT'S SDM 2011): study protocol for a randomized controlled trial. *Trials*.  
5 2 2011;12:232.  
6 3  
7  
8 4 24.Berger-Hoger B, Liethmann K, Muhlhauser I, Haastert B, Steckelberg A. Informed shared decision-  
9 making supported by decision coaches for women with ductal carcinoma in situ: study protocol for a  
10 cluster randomized controlled trial. *Trials*. 2015;16:452.  
11 5  
12 6  
13 7 25.Rahn AC, Kopke S, Kasper J, Vettorazzi E, Muhlhauser I, Heesen C. Evaluator-blinded trial  
14 evaluating nurse-led immunotherapy DEcision Coaching In persons with relapsing-remitting Multiple  
15 8 Sclerosis (DECIMS) and accompanying process evaluation: study protocol for a cluster randomised  
16 9 Sclerosis (DECIMS) and accompanying process evaluation: study protocol for a cluster randomised  
17 9 controlled trial. *Trials*. 2015;16:106.  
18 10  
19  
20 11 26.Elwyn G, O'Connor A, Stacey D, Volk R, Edwards A, Coulter A, et al. Developing a quality criteria  
21 12 framework for patient decision aids: online international Delphi consensus process. *BMJ*.  
22 12 2006;333(7565):417.  
23 13  
24  
25 14 27.Holmes-Rovner M. International Patient Decision Aid Standards (IPDAS): beyond decision aids to  
26 15 usual design of patient education materials. *Health Expect*. 2007;10(2):103-7.  
27 15  
28  
29 16 28.Veroff D, Marr A, Wennberg DE. Enhanced support for shared decision making reduced costs of care  
30 17 for patients with preference-sensitive conditions. *Health Aff (Millwood)*. 2013;32(2):285-93.  
31 17  
32  
33 18 29.Scalia P, Durand MA, Forcino RC, Schubbe D, Barr PJ, O'Brien N, et al. Implementation of the  
34 19 uterine fibroids Option Grid patient decision aids across five organizational settings: a randomized  
35 19 stepped-wedge study protocol. *Implement Sci*. 2019;14(1):88.  
36 20  
37  
38 21 30.Kirk MA, Kelley C, Yankey N, Birken SA, Abadie B, Damschroder L. A systematic review of the use  
39 22 of the Consolidated Framework for Implementation Research. *Implement Sci*. 2016;11:72.  
40 22  
41  
42 23 31.Shepherd HL, Barratt A, Jones A, Bateson D, Carey K, Trevena LJ, et al. Can consumers learn to ask  
43 24 three questions to improve shared decision making? A feasibility study of the ASK (AskShareKnow)  
44 24 Patient-Clinician Communication Model((R)) intervention in a primary health-care setting. *Health*  
45 25 *Expect*. 2016;19(5):1160-8.  
46 25  
47 26  
48 27 32.Shepherd HL, Barratt A, Trevena LJ, McGeechan K, Carey K, Epstein RM, et al. Three questions that  
49 28 patients can ask to improve the quality of information physicians give about treatment options: a cross-  
50 28 over trial. *Patient Educ Couns*. 2011;84(3):379-85.  
51 28  
52 29  
53 30 33.Leitlinie evidenzbasierte Gesundheitsinformation [Internet]. 2017. <http://www.leitliniegesundheits>  
54 30 [information.de/](http://www.leitliniegesundheitsinformation.de/). [accessed 12/16/2019]  
55 31  
56 31  
57  
58  
59  
60

- 1  
2  
3 1 34. General Methods 5.0. Institute for Quality and Efficiency in Health Care, IQWiG. 2017.  
4 file:///C:/Users/DANNER~1.TAK/AppData/Local/Temp/General-Methods\_Version-5-0.pdf.  
5 2  
6 3 [accessed 16/01/2019]  
7  
8 4 35. Stacey D, Murray MA, Legare F, Sandy D, Menard P, O'Connor A. Decision coaching to support  
9 5 shared decision making: a framework, evidence, and implications for nursing practice, education, and  
10 6 policy. *Worldviews Evid Based Nurs*. 2008;5(1):25-35.  
11  
12 7 36. Lerman CE, Brody DS, Caputo GC, Smith DG, Lazaro CG, Wolfson HG. Patients' Perceived  
13 8 Involvement in Care Scale: relationship to attitudes about illness and medical care. *J Gen Intern Med*.  
14 9 1990;5(1):29-33.  
15  
16 10 37. Scheibler F, Freise D, Pfaff H. Die Einbeziehung von Patienten in die Behandlung - Validierung der  
17 11 deutschen PICS Skalen. *Journal of Public Health*. 2004;12:199-209.  
18  
19 12 38. Bennett C, Graham ID, Kristjansson E, Kearing SA, Clay KF, O'Connor AM. Validation of a  
20 13 preparation for decision making scale. *Patient Educ Couns*. 2010;78(1):130-3.  
21  
22 14 39. Forcino RC, Barr PJ, O'Malley AJ, Arend R, Castaldo MG, Ozanne EM, et al. Using CollaboRATE, a  
23 15 brief patient-reported measure of shared decision making: Results from three clinical settings in the  
24 16 United States. *Health Expect*. 2018;21(1):82-9.  
25  
26 17 40. Dillmann DA. Mail and Internet Surveys. The Tailored Design Method. Wiley. New York. 2007.  
27  
28 18 41. Scheibler F, Pfaff H, Kowalski C, Ansmann L. Shared Decision Making in Breast Care Centers in  
29 19 North Rhine-Westphalia: Results of a 10-year trend analysis (article in press). *Z Evid Fortbild Qual*  
30 20 *Gesundhwes*. 2019.  
31  
32 21 42. Herold R, van den Berg N, Dorr M, Hoffmann W. Telemedical Care and Monitoring for Patients with  
33 22 Chronic Heart Failure Has a Positive Effect on Survival. *Health Serv Res*. 2018;53(1):532-55.  
34  
35 23 43. Ho D, Imai K, King G, Stuart EA. Matching as Nonparametric Preprocessing for Reducing Model  
36 24 Dependence in Parametric Causal Inference. *Political Analysis*. 2007;15:199-236.  
37  
38 25 44. Rapley T, Girling M, Mair FS, Murray E, Treweek S, McColl E, et al. Improving the normalization of  
39 26 complex interventions: part 1 - development of the NoMAD instrument for assessing implementation  
40 27 work based on normalization process theory (NPT). *BMC Med Res Methodol*. 2018;18(1):133.  
41  
42 28 45. Finch TL, Girling M, May CR, Mair FS, Murray E, Treweek S, et al. Improving the normalization of  
43 29 complex interventions: part 2 - validation of the NoMAD instrument for assessing implementation  
44 30 work based on normalization process theory (NPT). *BMC Med Res Methodol*. 2018;18(1):135.  
45  
46  
47  
48  
49  
50  
51  
52  
53  
54  
55  
56  
57  
58  
59  
60



1  
2  
3  
4  
5  
6  
7  
8  
9  
10  
11  
12  
13  
14  
15  
16  
17  
18  
19  
20  
21  
22  
23  
24  
25  
26  
27  
28  
29  
30  
31  
32  
33  
34  
35  
36  
37  
38  
39  
40  
41  
42  
43  
44  
45  
46  
47  
48  
49  
50  
51  
52  
53  
54  
55  
56  
57  
58  
59  
60

1 46. Finch TL, Rapley T, Girling M, Mair FS, Murray E, Treweek S, et al. Improving the normalization of  
2 complex interventions: measure development based on normalization process theory (NoMAD): study  
3 protocol. *Implement Sci.* 2013;8:43.

For peer review only

1  
2  
3  
4  
5  
6  
7  
8  
9  
10  
11  
12  
13  
14  
15  
16  
17  
18  
19  
20  
21  
22  
23  
24  
25  
26  
27  
28  
29  
30  
31  
32  
33  
34  
35  
36  
37  
38  
39  
40  
41  
42  
43  
44  
45  
46  
47  
48  
49  
50  
51  
52  
53  
54  
55  
56  
57  
58  
59  
60

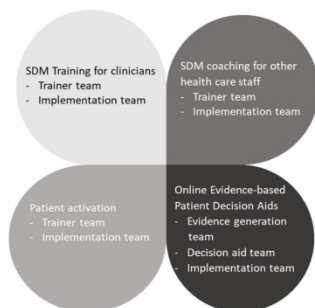

Figure 1. Project components and involved S2C teams

210x297mm (300 x 300 DPI)

1  
2  
3  
4  
5  
6  
7  
8  
9  
10  
11  
12  
13  
14  
15  
16  
17  
18  
19  
20  
21  
22  
23  
24  
25  
26  
27  
28  
29  
30  
31  
32  
33  
34  
35  
36  
37  
38  
39  
40  
41  
42  
43  
44  
45  
46  
47  
48  
49  
50  
51  
52  
53  
54  
55  
56  
57  
58  
59  
60

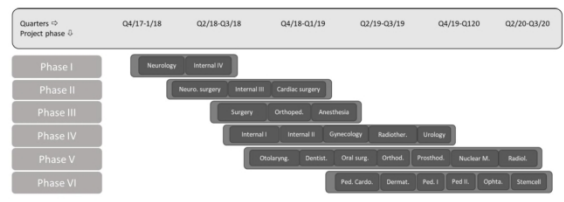

Figure 2. Sequential quarterly enrollment of new clinics  
210x297mm (300 x 300 DPI)

1  
2  
3  
4  
5  
6  
7  
8  
9  
10  
11  
12  
13  
14  
15  
16  
17  
18  
19  
20  
21  
22  
23  
24  
25  
26  
27  
28  
29  
30  
31  
32  
33  
34  
35  
36  
37  
38  
39  
40  
41  
42  
43  
44  
45  
46  
47  
48  
49  
50  
51  
52  
53  
54  
55  
56  
57  
58  
59  
60

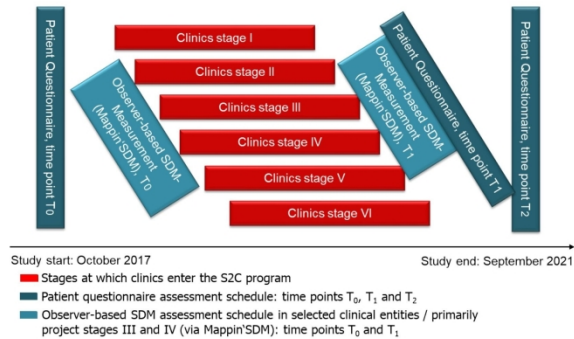

Figure 3. Project stages and data collection schedule for SDM evaluation

210x297mm (300 x 300 DPI)

# BMJ Open

## Making Shared Decision Making (SDM) a Reality: protocol of a large-scale long-term SDM implementation program at a Northern German University Hospital

|                                 |                                                                                                                                                                                                                                                                                                                                                                                                                                                                                                                                                                                                                                                                                                                                                                                                                                                                                                                                                                                                                                                                                                                                                                                 |
|---------------------------------|---------------------------------------------------------------------------------------------------------------------------------------------------------------------------------------------------------------------------------------------------------------------------------------------------------------------------------------------------------------------------------------------------------------------------------------------------------------------------------------------------------------------------------------------------------------------------------------------------------------------------------------------------------------------------------------------------------------------------------------------------------------------------------------------------------------------------------------------------------------------------------------------------------------------------------------------------------------------------------------------------------------------------------------------------------------------------------------------------------------------------------------------------------------------------------|
| Journal:                        | <i>BMJ Open</i>                                                                                                                                                                                                                                                                                                                                                                                                                                                                                                                                                                                                                                                                                                                                                                                                                                                                                                                                                                                                                                                                                                                                                                 |
| Manuscript ID                   | bmjopen-2020-037575.R1                                                                                                                                                                                                                                                                                                                                                                                                                                                                                                                                                                                                                                                                                                                                                                                                                                                                                                                                                                                                                                                                                                                                                          |
| Article Type:                   | Protocol                                                                                                                                                                                                                                                                                                                                                                                                                                                                                                                                                                                                                                                                                                                                                                                                                                                                                                                                                                                                                                                                                                                                                                        |
| Date Submitted by the Author:   | 28-Jun-2020                                                                                                                                                                                                                                                                                                                                                                                                                                                                                                                                                                                                                                                                                                                                                                                                                                                                                                                                                                                                                                                                                                                                                                     |
| Complete List of Authors:       | Danner, Marion; University Medical Center Schleswig-Holstein Campus Kiel, SHARE TO CARE Team<br>Geiger, Friedemann; University Medical Center Schleswig-Holstein Campus Kiel, SHARE TO CARE Team; SHARE TO CARE. Patientenzentrierte Kommunikation GmbH<br>Wehkamp, Kai; University Medical Center Schleswig-Holstein Campus Kiel, SHARE TO CARE Team; SHARE TO CARE. Patientenzentrierte Kommunikation GmbH<br>Rueffer, Jens Ulrich; TAKEPART Media & Sciences GmbH; SHARE TO CARE. Patientenzentrierte Kommunikation GmbH<br>Kuch, Christine; University Hospital Schleswig-Holstein - Campus Kiel, SHARE TO CARE Team<br>Sundmacher, L; Ludwig-Maximilians-Universitat Munchen<br>Skjelbakken, T; Universitetet i Tromso Helsevitenskapelige fakultet Helsefak,<br>Rummer, Anne; University Hospital Schleswig-Holstein - Campus Kiel, SHARE TO CARE Team<br>Novelli, Anna; Ludwig-Maximilians-Universitat Munchen<br>Debrouwere, Marie; University Medical Center Schleswig-Holstein Campus Kiel, SHARE TO CARE Team<br>Scheibler, Fueloep; University Hospital Schleswig-Holstein - Campus Kiel, SHARE TO CARE Team; SHARE TO CARE. Patientenzentrierte Kommunikation GmbH |
| <b>Primary Subject Heading</b>: | Patient-centred medicine                                                                                                                                                                                                                                                                                                                                                                                                                                                                                                                                                                                                                                                                                                                                                                                                                                                                                                                                                                                                                                                                                                                                                        |
| Secondary Subject Heading:      | Communication, Evidence based practice, Health services research                                                                                                                                                                                                                                                                                                                                                                                                                                                                                                                                                                                                                                                                                                                                                                                                                                                                                                                                                                                                                                                                                                                |
| Keywords:                       | Change management < HEALTH SERVICES ADMINISTRATION & MANAGEMENT, Organisational development < HEALTH SERVICES ADMINISTRATION & MANAGEMENT, Organisation of health services < HEALTH SERVICES ADMINISTRATION & MANAGEMENT, Quality in health care < HEALTH SERVICES ADMINISTRATION & MANAGEMENT                                                                                                                                                                                                                                                                                                                                                                                                                                                                                                                                                                                                                                                                                                                                                                                                                                                                                  |
|                                 |                                                                                                                                                                                                                                                                                                                                                                                                                                                                                                                                                                                                                                                                                                                                                                                                                                                                                                                                                                                                                                                                                                                                                                                 |

1  
2  
3  
4  
5  
6  
7  
8  
9  
10  
11  
12  
13  
14  
15  
16  
17  
18  
19  
20  
21  
22  
23  
24  
25  
26  
27  
28  
29  
30  
31  
32  
33  
34  
35  
36  
37  
38  
39  
40  
41  
42  
43  
44  
45  
46  
47  
48  
49  
50  
51  
52  
53  
54  
55  
56  
57  
58  
59  
60

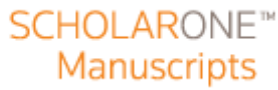

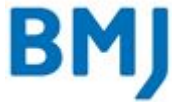

I, the Submitting Author has the right to grant and does grant on behalf of all authors of the Work (as defined in the below author licence), an exclusive licence and/or a non-exclusive licence for contributions from authors who are: i) UK Crown employees; ii) where BMJ has agreed a CC-BY licence shall apply, and/or iii) in accordance with the terms applicable for US Federal Government officers or employees acting as part of their official duties; on a worldwide, perpetual, irrevocable, royalty-free basis to BMJ Publishing Group Ltd ("BMJ") its licensees and where the relevant Journal is co-owned by BMJ to the co-owners of the Journal, to publish the Work in this journal and any other BMJ products and to exploit all rights, as set out in our [licence](#).

The Submitting Author accepts and understands that any supply made under these terms is made by BMJ to the Submitting Author unless you are acting as an employee on behalf of your employer or a postgraduate student of an affiliated institution which is paying any applicable article publishing charge ("APC") for Open Access articles. Where the Submitting Author wishes to make the Work available on an Open Access basis (and intends to pay the relevant APC), the terms of reuse of such Open Access shall be governed by a Creative Commons licence – details of these licences and which [Creative Commons](#) licence will apply to this Work are set out in our licence referred to above.

Other than as permitted in any relevant BMJ Author's Self Archiving Policies, I confirm this Work has not been accepted for publication elsewhere, is not being considered for publication elsewhere and does not duplicate material already published. I confirm all authors consent to publication of this Work and authorise the granting of this licence.

1  
2  
3 1 **TITLE PAGE**  
4

5 2 **Making Shared Decision Making (SDM) a Reality: protocol of a large-scale long-term SDM**  
6  
7 3 **implementation program at a Northern German University Hospital**  
8  
9

10 4 **Running title:** Protocol of a large-scale long-term SDM implementation program  
11

12  
13 5 Marion Danner<sup>1</sup>, Friedemann Geiger<sup>1,2</sup> Kai Wehkamp<sup>1,2</sup>, Jens Ulrich Ruffer<sup>2,3</sup>, Christine Kuch<sup>1</sup>, Leonie  
14  
15 6 Sundmacher<sup>4</sup>, Tove Skjelbakken<sup>5</sup>, Anne Rummer<sup>1</sup>, Anna Novelli<sup>4</sup>, Marie Debrouwere<sup>1</sup>, Fueloep  
16  
17 7 Scheibler<sup>1,2</sup> on behalf of the SHARE TO CARE (S2C) Project Team<sup>1</sup>  
18  
19

20 8 **Affiliations:**  
21

22 9 <sup>1</sup> University Medical Center Schleswig-Holstein, SHARE TO CARE Team, Kiel, Germany  
23  
24

25 10 <sup>2</sup> SHARE TO CARE. Patientenzentrierte Kommunikation GmbH, Cologne, Germany  
26  
27

28 11 <sup>3</sup> TAKEPART Media & Science GmbH, Cologne, Germany  
29

30 12 <sup>4</sup> Ludwig-Maximilians-Universität (LMU), Munich, Germany  
31  
32

33 13 <sup>5</sup> University Hospital North-Norway, Tromsø, Norway  
34  
35  
36  
37

38 15 **Corresponding author:**  
39

40  
41 16 Marion Danner, Sonderprojekt Shared Decision Making, Projektstandort Köln  
42

43 17 Maria-Hilf-Straße 15  
44

45  
46 18 50677 Köln  
47

48  
49 19 Phone: +49 (0)221-29257-663  
50

51 20 Email: marion.danner@uksh.de  
52  
53  
54 21  
55  
56  
57  
58  
59  
60



- 1
- 2
- 3 1
- 4
- 5
- 6 2
- 7
- 8 3
- 9
- 10
- 11 4
- 12
- 13
- 14 5 **Article type:** Protocol Publication
- 15
- 16 6 **Maximum words:** 4000 words (not including title page, abstract, references, tables or figure legends).
- 17
- 18
- 19 7 Current word count: 4082 words
- 20
- 21
- 22
- 23
- 24
- 25
- 26
- 27
- 28
- 29
- 30
- 31
- 32
- 33
- 34
- 35
- 36
- 37
- 38
- 39
- 40
- 41
- 42
- 43
- 44
- 45
- 46
- 47
- 48
- 49
- 50
- 51
- 52
- 53
- 54
- 55
- 56
- 57
- 58
- 59
- 60

## 1 ABSTRACT

2 **Introduction:** Shared Decision Making (SDM) is not yet widely used when making decisions in German  
3 hospitals. Making SDM a reality is a complex task. It involves training health care professionals in SDM  
4 communication and enabling patients to actively participate in communication, in addition to providing  
5 sound, easy to understand information on treatment alternatives in the form of evidence-based patient  
6 decision aids (EbPDAs). This project funded by the German Innovation Fund aims at designing,  
7 implementing, and evaluating a multicomponent, large-scale and integrative SDM program - called  
8 SHARE TO CARE (S2C) - at all clinical departments of a University Hospital Campus in Northern  
9 Germany within a four-year time period.

10 **Methods and Analysis:** S2C tackles the aforementioned components of SDM: (1) training physicians in  
11 SDM communication (2) activating and empowering patients (3) developing EbPDAs in the most  
12 common/relevant diseases, and (4) training other health care professionals in SDM coaching. S2C is  
13 designed together with patients and providers. The physicians' training program entails an online and an  
14 in situ training module. The decision coach training is based on a similar but less comprehensive  
15 approach. The development of online EbPDAs follows the International Patient Decision Aid Standards  
16 (IPDAS) and includes written, graphical and video-based information. Validated outcomes of SDM  
17 implementation are measured in a pre-post-intervention evaluation design. Process evaluation  
18 accompanies program implementation. Health economic impact of the intervention is investigated using a  
19 propensity-score matched approach based on potentially preference-sensitive hospital decisions.

20 **Ethics and Dissemination:** Ethics committee review approval has been obtained from Medical Ethics  
21 Committee of the Medical Faculty of the Christian-Albrechts-University (CAU) Kiel. Project information  
22 and results will be disseminated at conferences, on project-hosted websites at UKSH and by S2C as well  
23 as in peer-reviewed and professional journals.

- 1 **KEYWORDS (max. 6):** Shared Decision Making (SDM), SDM training, Evidence-based Patient
- 2 Decision Aid (EbPDA), patient activation, decision coaching

For peer review only

## 1           2           3           4           5           6           7           8           9           10           11           12           13           14           15           16           17           18           19           20           21           22           23           24           25           26           27           28           29           30           31           32           33           34           35           36           37           38           39           40           41           42           43           44           45           46           47           48           49           50           51           52           53           54           55           56           57           58           59           60

## 1           2           3           4           5           6           7           8           9           10           11           12           13           14           15           16           17           18           19           20           21           22           23           24           25           26           27           28           29           30           31           32           33           34           35           36           37           38           39           40           41           42           43           44           45           46           47           48           49           50           51           52           53           54           55           56           57           58           59           60

- This study is the first large-scale long-term implementation of SDM in an entire University Hospital involving all stakeholders in patient care in a multi-component intervention.
- Due to the size of our target intervention unit a comparative study randomizing comparable hospitals was neither feasible nor affordable.
- This study aims to detect important SDM implementation barriers and supporting factors in a busy and profit-oriented hospital setting.
- One limitation might be that there are no strong incentives for health care professionals' and patients' to contribute to the implementation of SDM.
- Another limitation is that no patients were involved in the design of this study.

## 1 INTRODUCTION

2 Shared Decision Making (SDM) between health care professionals like physicians or nurses and patients  
3 is currently not a standard in German hospitals. (1, 2) SDM has rather been implemented sporadically in  
4 individual indications and health care settings. (3, 4) This lack of SDM in routine settings might be due to  
5 a range of provider, patient, organizational, economic, and contextual factors. (1, 2, 5) On the other hand,  
6 German legislation with the Patients' Rights Act gave SDM a more prominent role in German health care  
7 in 2013. (6) The act implies that health care professionals and patients follow SDM communication rules.  
8 For example, physicians have to comprehensively inform their patients about relevant treatment  
9 alternatives (§630e). (6) In this context, the law points out that written material like patient decision aids  
10 may support professionals in meeting these legal requirements. While legislation in Germany hence  
11 seems to be ready for SDM and supporting instruments such as evidence-based Patient Decision Aids  
12 (EbPDAs), stakeholders in daily practice are not yet routinely implementing it.

13 For SDM to be effective, the patients' and the health care providers' ability and willingness to participate  
14 in SDM are crucial. (2, 7) To make SDM a reality in any health care setting is an ambitious endeavor and  
15 a complex multi-level task. (5) It involves training physicians and other health care professionals in SDM  
16 communication skills as well as encourage patients to actively participate in communication, in addition  
17 to providing evidence-based, easy to understand information on treatment alternatives to patients and their  
18 physicians. (8) To be effective in daily practice, SDM should be co-designed with involved stakeholders  
19 to gain acceptance and recognition. (3) In addition, it needs an inner (i.e., within the institution that wants  
20 to do SDM) and an outer (concerning the external conditions in which the institution works) setting, in  
21 which program implementation is possible, as defined e.g. by the Consolidated Framework for  
22 Implementation Research (CFIR) (see Table 1 for this project). (9) The Norwegian "Decision Aid (DA)  
23 Factory" approach of the University Hospital North Norway, in which researchers and developers of  
24 SDM components – so-called "knowledge producers" – work in close cooperation with the physicians  
25 and patients – so-called "knowledge users" – inspired implementation processes in this project. (10)

1 Individual components of SDM such as SDM training for health care professionals, patient  
2 activation/empowerment programs or decision aids have all been previously tested in specific indications,  
3 populations and using different study designs. (11-15) Their effectiveness and impact on decision  
4 processes have been assessed. For example, according to a recent systematic review of 115 Randomized  
5 Controlled Trials (RCTs) with about 35.000 patients altogether, the use of only EbPDAs to inform  
6 patients in specific indications led to improved health education/literacy, more active participation and  
7 value congruent choices, more accurate expectations regarding course of disease and risk perceptions,  
8 more treatment satisfaction and better adherence to treatment. (14) This finding has been reinforced by  
9 reviews in other specific populations. (16) However, most of the EbPDAs previously tested in RCTs  
10 while having proven effectiveness are not subsequently used in the settings they were developed in. (3) A  
11 recent study by Stacey et al. 2019 concluded that “To improve subsequent use, researchers should  
12 codesign EbPDAs with end users to ensure fit with clinical practice and develop an implementation plan”.  
13 (3) That study surveyed EbPDA developers who reported that the lack of physicians supporting and  
14 agreeing with the EbPDAs often hindered successful implementation. Training physicians in SDM in  
15 theory and practice has equally demonstrated to be effective, but the certainty of this evidence is low and  
16 limited to specific treatment settings. (15, 17-19) While there may still be a lack of evidence regarding the  
17 effectiveness of SDM on patient-relevant clinical endpoints, there is growing agreement and consensus  
18 that SDM is a necessity, a patients’ and a citizen’s right, and an ethical imperative. (7)

19 It has also become clear that effectiveness to a large extent will depend on effective implementation  
20 strategies and consistent stakeholder involvement. (3, 5) Hence, given a growing body of evidence  
21 supporting the effectiveness of individual SDM interventions, the next step on the “continuum of  
22 increasing evidence” according to Campbell et al. (20, 21) would be to roll out the combined  
23 implementation of SDM interventions on a larger-scale in a long-term implementation study. Few  
24 programs until now have addressed the simultaneous implementation of a range of SDM components at  
25 the same time (see e.g. Sondergaard 2019, Dahl Steffensen 2018 (22, 23)), some are currently ongoing

1 (see e.g. Scholl 2018 (24)), but none have yet introduced a multi-component SDM program at all  
2 departments of a hospital at a time. Therefore, in this publicly funded project the objective was to design,  
3 implement and evaluate a multicomponent, large-scale and integrative SDM program - called SHARE TO  
4 CARE (S2C) - at the University Hospital Medical Center Schleswig Holstein (UKSH), Campus Kiel,  
5 within a 4 year time period - from October 2017 until September 30, 2021. The project is designed and  
6 implemented in cooperation between the UKSH, Kiel, Germany, and the University Hospital of Northern  
7 Norway, Tromsø, Norway.

## 8 **METHODS AND ANALYSIS**

### 9 **Study design**

10 This study implies the large-scale implementation of SDM at the University Hospital Campus Kiel within  
11 a four-year time period based on the S2C intervention program. It includes comprehensive outcome  
12 evaluation with measurement of (1) SDM level in patient-physician-interactions based on patients' and  
13 external observers' perceptions before and after S2C implementation and (2) measuring the impact of the  
14 S2C intervention on health care use and costs in comparison to a propensity-score matched comparison  
15 population not exposed to S2C. The program will be accompanied by a process evaluation based on the  
16 recommendations of the Medical Research Council Guidance and using the Consolidated Framework for  
17 Implementation Research (CFIR) to guide development and implementation activities. (9, 25)

18 The term “multicomponent” in the S2C program refers to four different interventions (components)  
19 designed and implemented simultaneously in several clinical departments. This includes (1) SDM training  
20 for physicians (17-19, 26), (2) SDM qualification as “decision coach” for other health care professionals  
21 like nurses or physiotherapists (18, 27), (3) the Ask Three Questions program that aims at patient  
22 activation and empowerment, and (28, 29) (4) development of online EbPDAs (14). These components  
23 and the respective responsible S2C project teams are depicted in Figure 1.

24 *Insert here: Figure 1*

1 The term “large-scale” means that the program will sequentially be implemented at the University  
2 Hospital Campus Kiel involving 27 clinical departments with more than 650 physicians. The aim is to  
3 develop 83 EbPDAs enrolling new clinical departments into the program every six months and  
4 identifying EbPDA topics at each clinic (Figure 2). At the same time, each physician in the respective  
5 clinic undergoes SDM training. The Ask Three Questions patient activation is implemented  
6 simultaneously. In addition, in selected departments a total of 150 other health care professionals will be  
7 trained as decision coaches to facilitate EbPDA use in specific patient target groups.

8 *Insert here: Figure 2*

9 The term “integrative” in S2C means that patients and health care professionals will be actively involved  
10 from the very beginning and throughout implementation, most actively in EbPDA development but also  
11 e.g. in training evaluation and in the patient activation program (10). The integrative approach begins with  
12 identifying new topics together with physicians and conducting needs assessments with patients. It ends  
13 with having physicians distribute EbPDAs to patients in their clinical departments. Sample patients will  
14 also user-test the EbPDAs before these will be administered to patients in daily practice.

### 15 **Patient and Public Involvement**

16 No patient was involved in the development or design of this study.

### 17 **Theoretical Framework**

18 At the micro-level (level of health care professionals or patients), the S2C program is designed and  
19 implemented on the grounds of the Theory of Planned Behavior suggesting behavior is a result of  
20 motivation (intention) and ability (perceived behavior control) (30, 31). Accordingly, the S2C program  
21 aims to induce attitude and perception-changes by training physicians and other health care professionals  
22 in SDM and by informing patients to enable simultaneous behavior change at the level of patients and  
23 health care providers. The interactive process of EbPDA-development also aims at changing attitudes at  
24 the individual physician level. The implementation of the S2C program is at the microlevel guided by the



1 concept of Normalization Process Theory (NPT). The four components of the NPT are coherence (does  
2 the program make sense to those who are involved?), participation (how do relevant stakeholders  
3 participate in implementation?), collective action (what to do to make implementation successful?) and  
4 reflexive monitoring (how do the involved individuals judge implementation processes?). (32) As part of  
5 a process evaluation, these questions/constructs will be addressed with key stakeholders at specific points  
6 in time throughout the four-year project time to continuously monitor implementation processes at the  
7 level of all involved stakeholders at the University hospital campus Kiel.

8 The complexity of this project taking into account context and processes of project implementation is  
9 depicted in Table 1 following the CFIR (<https://cfirguide.org/>). This framework comprises five domains  
10 (intervention characteristics, outer setting, inner setting, characteristics of individuals, and process) and 39  
11 related constructs. (9, 33, 34). The constructs of the CFIR were used to describe the status quo of relevant  
12 project characteristics, project settings, and potential interactions between these at project initiation. CFIR  
13 will also guide our implementation processes as described later.

14 *Insert somewhere here: Table 1.*

### 15 **Setting and Study population**

16 Campus Kiel as part of the UKSH Medical Center is a tertiary care hospital with more than 200.000 cases  
17 treated each year. 27 clinical departments with more than 650 physicians and more than 150 other health  
18 care professionals and their patients will be part of either training modules or development and use of  
19 decision aids or both. New clinical department and their patients will be sequentially enrolled in the study  
20 (Figure 2).

### 21 **S2C Intervention components**

22 *Intervention “SDM training for physicians”*

1 This module aims at providing structured SDM training in three steps to a minimum of 80 % of  
2 physicians working at the UKSH (i.e., at least 520 physicians should receive training). The module is  
3 based on the pretested and validated training approach that has demonstrated to be effective and lead to an  
4 increased patient, physician and observer perception of involvement in decision making. (17, 18)  
5 Preceding training, each physician has to take a baseline video of him or herself with a patient in a real  
6 decision making interaction. The physician then undergoes an online video tutorial which contains  
7 general information on SDM and its application in clinical practice. It also contains fictional interactions  
8 between physician and patient actors teaching physicians to differentiate “good” from SDM  
9 communication “in need of improvement”. For the subsequent video-based small group training sessions,  
10 the baseline video recording of a patient-physician interaction and a second recording (following online  
11 training) are rated by the S2C trainer team (see Table 2 for additional information). In the subsequent  
12 group training, each physician receives video-based trainer and group feedback. The aim is to provide an  
13 interactive and common SDM learning experience to physician. To increase their motivation, training  
14 participation is rewarded by continued medical education credits by the German Medical Associations.

#### 15 *Intervention “Activation of patients”*

16 The “Ask Three Questions” program has originally been developed in Australia and tested in European  
17 countries (28, 29). Patients are instructed and motivated to actively participate in communication by  
18 asking their doctors questions regarding their specific (treatment) situation. Our patient activation concept  
19 communicates the message “Ask Three questions - decide together” in a unique design at all departments  
20 using various distribution channels: paper postcards, posters/stand-up displays, and screen-based  
21 messages inside UKSH. It will be embedded in several other interventions, like a patient homepage  
22 within the UKSH-homepage, the bedside infotainment system, information screens and special SDM-  
23 days in the central lobby.

#### 24 *Intervention “(Online) Evidence-Based Patient Decision Aids (EbPDAs)”*

1  
2  
3 1 Eighty-three online EbPDAs will be developed, at least one in each department. The number is arbitrary,  
4  
5 2 as there is no recommended number per department. We calculated the maximum possible number given  
6  
7 3 the resources and the time frame of our grant. Consistent with the DA factory approach implementation  
8  
9 4 starts with the identification of EbPDA topics together with physicians. Topics should be important for  
10  
11 5 physicians, involve at least two preference-sensitive treatment alternatives, and occur frequently. Topic  
12  
13 6 specification with respect to target patient population, relevant treatment options, and patient-relevant  
14  
15 7 outcomes/issues of treatment is done based on a literature/guideline review and in exchange with  
16  
17 8 physicians and patients. Needs assessments are conducted with about 4-8 patients per topic to guide and  
18  
19 9 structure EbPDAs as closely to patient needs as possible. Development of EbPDAs involves a systematic  
20  
21 10 search and assessment of best available evidence for all relevant interventions, focusing on systematic  
22  
23 11 reviews and evidence-based guidelines. Methods are based on the German standards of evidence-based  
24  
25 12 patient information and the methods of evidence generation in patient information. (35, 36) Text  
26  
27 13 information on disease and treatment will be accompanied by video sequences with UKSH physicians and  
28  
29 14 patients. In these sequences physicians explain treatments and patients share their experience in decision  
30  
31 15 making. The latter is to motivate users of the online DAs to actively participate in decision-making. To  
32  
33 16 avoid bias by testimonials, patients do not rate the different interventions in their video sequences but  
34  
35 17 limit themselves to talking about their experience with the disease and their individual decision process.  
36  
37 18 The process of DA development follows the International Patient Decision Aids Standards (IPDAS)  
38  
39 19 criteria ([www.ipdas.ohri.ca](http://www.ipdas.ohri.ca) (37, 38)). Each EbPDA undergoes external review.  
40  
41  
42  
43

#### 44 *Intervention “SDM Training for other health care professionals to be Decision Coach”*

45  
46  
47 21 This qualification module provides SDM training to about 150 nurses or other health care professionals in  
48  
49 22 specific indications, where patients most likely will need support in using EbPDAs. Training principles  
50  
51 23 are based on the physician training and decision coaching application in specific settings. (12, 13, 27, 39)  
52  
53 24 The goal is to train health care staff like nurses or physiotherapists to act as “decision coaches” for their  
54  
55 25 patients when using EbPDAs, i.e., to simultaneously provide emotional, psychological and technical  
56  
57  
58  
59  
60

1 support. The qualification consists of two workshop days communicating the principles of SDM and  
2 EbPDAs and including two individual decision coaching sessions for each participant. In addition, each  
3 decision coach will be asked to videotape coaching communications with a patient twice and receive  
4 individual SDM trainer feedback. Coaching communication with the patient centers around a relevant  
5 EbPDA.

## 6 **Study Outcome and outcome measures**

7 The primary intervention outcome is whether and to what degree SDM-based interaction is provided to  
8 patients at UKSH. To cover different perspectives, we focus on two types of outcome measures, one  
9 providing the patient perspective and one providing an observer-based perspective (Table 2). The primary  
10 outcome is based on a validated SDM measurement instrument, the Perceived Involvement in Care Scales  
11 (PICS). (40, 41) It is a patient-reported outcome instrument translated and validated in Germany, and  
12 consists of three subscales with 4-5 items each. The subscales are (1) patient activation by doctors (5  
13 items), (2) active information seeking behavior (4 items) and (3) perceived patient participation in  
14 decision making (5 items). Each item is measured on a scale from 1 = „do not agree at all“ to 4 = „totally  
15 agree“. The second primary outcome consists in an observer rating of patient-physician interaction before  
16 and after intervention using the MAPPIN'SDM-O-dyad instrument. (17, 18, 26) MAPPIN'SDM-O-dyad  
17 measures the degree of SDM performance realized by the doctor-patient dyad (i.e., by the unit made up of  
18 patient and physician) as rated by independent observers. The instrument consists of 9 items assessing the  
19 process and quality of SDM. Each item is scored from “0” (“the indicator is not present”) to “4” (“the  
20 indicator is present at an excellent standard”). The observer ratings are provided by independent but  
21 trained raters who rate video recordings of patient-physician-interactions before and after the intervention  
22 (see “data collection and analyses”). All observers are blinded to the measurement objects and time points  
23 of video recordings.

1  
2  
3 1 Additional secondary outcomes included in the patient questionnaire are two validated and widely-used  
4  
5 2 questionnaires, the Preparation for Decision Making Scale (PrepDM: 10 items; 5-point scale) (42) and  
6  
7 3 collaboRATE (43) (3 items; 5-point scale). All outcome measures are detailed in Table 2.  
8  
9

10 4 *Insert somewhere here:* Table 2.  
11  
12

### 13 5 **Data collection**

14

15  
16 6 Primary outcome data collection is conducted via patient questionnaire (including the PICS instrument)  
17  
18 7 before (T<sub>0</sub>) and twice after the intervention (T<sub>1</sub>, T<sub>2</sub>). The data collection and evaluation schedule is  
19  
20 8 depicted in Figure 3.  
21

22 9 *Insert here:* Figure 3  
23  
24

25  
26 10 The first patient questionnaire/PICS measurement (T<sub>0</sub>) is scheduled at study initiation. The second (T<sub>1</sub>) is  
27  
28 11 taken after completion of the S2C intervention at each department to assess immediate intervention effect.  
29  
30 12 The intervention is considered complete at the department level when at least 80% of physicians have  
31  
32 13 undergone training, EbPDAs are developed and in use, and the patient activation program is in place. The  
33  
34 14 last measurement (T<sub>2</sub>) is scheduled six months before study completion. It aims to appraise the  
35  
36 15 sustainability of the S2C intervention. At T<sub>0</sub> and T<sub>2</sub>, the patient questionnaire is mailed to a consecutive  
37  
38 16 sample of patients that were hospitalized at the UKSH Kiel campus within the preceding weeks with a  
39  
40 17 return envelope included in each mailing. At T<sub>1</sub>, the questionnaire is sent to a respective sample of  
41  
42 18 patients from a clinical department that completed the intervention. Patients who do not return the  
43  
44 19 questionnaire within a 2- or 4-week time frame, respectively, will get a reminder either once or twice.  
45  
46 20 Based on the Total Design Method approach by Dillmann et al. (44). Final response rates of at least 60-  
47  
48 21 70% are expected.  
49  
50

51  
52 22 The observer-based outcome measurement via MAPPIN'SDM-O-dyad is performed twice throughout the  
53  
54 23 4-year study period, at T<sub>0</sub> and T<sub>1</sub>. To minimize workload for physicians, who must videotape encounters  
55  
56 24 with patients to facilitate the MAPPIN'SDM-O-dyad evaluation, these assessments focus on central  
57

1 domains of hospital medicine (internal medicine, oncology, gynecology, surgery, orthopedics) being  
2 covered by specific clinical departments (departments of general surgery, internal medicine, radiotherapy,  
3 oncology & hematology, gynecology, trauma surgery & orthopedics, urology, gynecology).

#### 4 **Sample size calculation and data analyses**

5 Sample size calculation for the patient-based primary outcome is based on published PICS data (41, 45).  
6 An assumed difference of 0.4 in the PICS outcome at  $T_1$  versus  $T_0$  and a standard deviation of 0.7 yields a  
7 sample size of about 40 for each clinical department at each measurement, using an independent sample t-  
8 test and assuming a power of 80% and a level of significance of 5% (one-sided, assuming a positive effect  
9 of the SDM-intervention). This yields a campus-wide sample of 1080 patients (27 clinics, 40 patients per  
10 clinic). A difference in PICS scores of 0.4 comparing before and after measurement is considered relevant  
11 (Hedges  $g > 0.5$ , which corresponds to a medium size effect). If the distribution does not allow the  
12 assumption of normality, appropriate non-parametric tests will be applied in data analyses.

13 A presumed response rate of 60-70% to the patient questionnaire mailings leads us to target about 1600  
14 patients at measurement point  $T_0$  and  $T_2$  the campus level to finally achieve at least about 1000 patient  
15 questionnaires returned, yielding on average between 30-60 returned questionnaires per clinical  
16 department. These numbers will allow to measure significant differences in the primary endpoint not only  
17 at the campus but also at the individual department level (at least in the larger ones). At  $T_1$ , a minimum of  
18 65-70 patients has to be contacted to have at least 40 questionnaires returned.

19 Sample size for the second primary outcome assessment (MAPPIN'SDM observer assessment) is given  
20 by the number of physicians at the involved clinical departments. 7 of the 27 UKSH departments will be  
21 part of the MAPPIN'SDM assessment. Physicians in these departments sum up to 200 to 220 in total.  
22 Each physician will deliver a patient-physician-interaction video for outcome measurement at each  
23 measurement point. This analysis includes general surgery ( $n=30-40$  physicians), internal medicine  
24 ( $n=62$ ), radiotherapy ( $n=16$ ), oncology/hematology ( $n=21$ ), orthopedics ( $n=27$ ), gynecology ( $N=34$ ), and

1 urology (N=10-20). Based on a previous study including training of physicians only (18), we aim at an  
2 effect size of  $d=0.5$  (Hedges  $g$ ). To yield a power of 80% ( $\alpha=5\%$ ), minimal sample size should be  
3  $N=51$ . Assuming a response rate above 60% ( $N \geq 120$ ), the sampling strategy leads to a sufficient sample  
4 size. It is hypothesized that in 80% of patient-physician-interactions patients will receive satisfactory  
5 SDM-based treatment at the second department-wide measurement ( $T_1$ ) compared to less than 80%  
6 before the intervention ( $T_0$ ). To answer the latter study hypothesis, a MAPPIN-SDM-O-dyad mean value  
7 of greater or equal to 1.5 was defined as satisfactory basic patient involvement in decision making based  
8 on previous validation research. (18)

### 9 **Health Economic Evaluation**

10 In addition to the pre-post SDM evaluation, an economic evaluation will be conducted. This analysis will  
11 be based on insurance claims data provided by the largest German Health Insurance provider (Techniker  
12 Krankenkasse; TK). In Germany, approximately 88 % of the population (72,8 million) is covered under  
13 the comprehensive statutory health insurance system. The TK provides health insurance for  
14 approximately 9.8 million people (13% of the statutory contributors) and routinely collects data for  
15 reimbursement purposes on hospital stays, physician visits, medical procedures, medication, and medical  
16 diagnoses. In the economic evaluation, incremental costs and use of specific services of patients admitted  
17 to the UKSH with preference-sensitive conditions in specific clinical departments (intervention group)  
18 will be compared to a matched population (control group) drawn from the administrative dataset from the  
19 TK. The control group includes patients with a hospital admission to another German University or  
20 Educational hospital (tertiary medical center). From this sample population, patients will be matched to  
21 the intervention group using exact matching, propensity score matching or a combination of exact and  
22 propensity score matching. (46, 47) Matching criteria will include patient characteristics like age and sex,  
23 the main diagnosis of the hospital admission as well as measures of morbidity within 12 months  
24 preceding hospital admission. In line with previous research (48), variables that are compared across  
25 groups include preference-sensitive surgery rates, imaging rates, inpatient costs, total medical costs and

1 hospital and emergency department admissions within 12 months after the admission to the hospital. To  
2 account for systematic differences between intervention and control group, the analysis will focus on the  
3 comparison of the difference in outcomes measured at two points in time, before and after the  
4 implementation of the SDM intervention. The analysis will be limited to about 10 to 15 frequently  
5 occurring and preference-sensitive conditions. These conditions will include but are not limited to  
6 cardiologic diseases, benign prostatic hyperplasia and other urologic diseases, benign uterine diseases and  
7 obstetrics, neurosurgery / back pain, and orthopaedic diseases such as knee or hip replacement.

## 8 **Process evaluation**

9 Starting point for our evaluation are the CFIR constructs as depicted in Table 1. They summarize each  
10 study component, involved stakeholders, context (inner/outer setting), and processes at study initiation.  
11 Each construct is followed up throughout the course of the study aiming to (1) identify areas where  
12 adaptations to initially planned implementation might be needed and (2) better understand which clinical  
13 departments might be more/less accessible to the SDM interventions and why. Process evaluation is done  
14 by using (a) documentation (e.g. documentation of decision aid use by simply counting click/user  
15 numbers and times or documentation of number of physician trainings performed per clinical department)  
16 (b) interview or structured questionnaire data. Interviews and structured questionnaires with stakeholders  
17 regarding implementation processes will be developed based on the described four concepts of the NPT  
18 theory (49-51). In addition, field notes are used by the respective project teams (Figure 1) to adapt  
19 implementation strategies and processes to the specific demands of individual department's circumstances  
20 during the intervention phase.

## 21 **ETHICS AND DISSEMINATION**

22 The Medical Ethics Committee of the Medical Faculty of the Christian-Albrechts-University (CAU) Kiel  
23 has provided ethics approval to this study (reference number A111/18). This study will be conducted in  
24 accordance with German laws and regulations of the Medical Ethics Committee of the CAU, Kiel,



1  
2  
3 1 Germany. Eligible patients or health care providers will be fully informed about the study and asked to  
4  
5 2 participate in each part of the study: conducting personal interviews with patients (needs assessment), or  
6  
7 3 video sequences with physicians/patients, or involving physicians in training sessions. Patients/providers  
8  
9 4 will receive a respective information letter and will be informed about the implications of participation.  
10  
11 5 They will have sufficient opportunity to ask questions and to consider the implications of the study before  
12  
13 6 deciding to participate. Before participation, all individuals will provide written informed consent,  
14  
15 7 compliant with the local and ethical data regulations. Patients and clinical staff will be allowed to  
16  
17 8 withdraw from the study without giving a reason, at any time. The results arising from this  
18  
19 9 implementation study will be presented at scientific meetings, on project-hosted websites at UKSH and  
20  
21 10 by S2C as well as published in peer-reviewed journals. There is no intention to use professional writers  
22  
23  
24 11 and authorship will be based on the International Committee of Medical Journal Editors Guidelines.  
25  
26  
27  
28  
29  
30  
31  
32  
33  
34  
35  
36  
37  
38  
39  
40  
41  
42  
43  
44  
45  
46  
47  
48  
49  
50  
51  
52  
53  
54  
55  
56  
57  
58  
59  
60

1  
2  
3 Table 1. Consolidated Framework for Implementation Research (CFIR), S2C project-specific information for Evidence-based Decision Aids and  
4  
5 2 SDM Training for physicians / Training program for decision coaching for other health care professionals\*

| Construct                              | Evidence-based Patient Decision Aids (EbPDAs)                                                                                                                                                                                                                                                                                                                                                                                                                          | SDM Training for physicians / Training program for “decision coaching”                                                                                                                                                                                                                                                                                                                                                                                                          |
|----------------------------------------|------------------------------------------------------------------------------------------------------------------------------------------------------------------------------------------------------------------------------------------------------------------------------------------------------------------------------------------------------------------------------------------------------------------------------------------------------------------------|---------------------------------------------------------------------------------------------------------------------------------------------------------------------------------------------------------------------------------------------------------------------------------------------------------------------------------------------------------------------------------------------------------------------------------------------------------------------------------|
| <b>I. INTERVENTION CHARACTERISTICS</b> |                                                                                                                                                                                                                                                                                                                                                                                                                                                                        |                                                                                                                                                                                                                                                                                                                                                                                                                                                                                 |
| Intervention Source                    | EbPDAs are developed internally by the S2C team. Topics for new EbPDAs are generated together with the physicians based on the DA factory approach. Patients are involved early on via needs assessments to inform EbPDA development. Evidence syntheses are conducted by well-known best-in class external consultant groups (EBSCO, USA (producers of the DynaMed point in care services, well-known to UKSH physicians, and Kleijnen Systematic Reviews (KSR), UK). | The training for physicians was developed and validated by members of the S2C team (17, 18, 26). The decision coaching training is developed by the S2C team in line with the physician training and based on existing decision coaching programs (27, 52). With a group of psychologists/coaching specialists, the trainer team combines scientific and practical expertise to train different types of health care providers in SDM communication / decision coaching skills. |
| Evidence Strength & Quality            | A current systematic review demonstrates that decision aids improve decision and indication quality (14). Our EbPDAs follow the International Patient Decision Aids Standards (IPDAS) (37, 38) and provide balanced and easy to understand information on the pros and cons of treatment alternatives to patients. With the Patients’ Rights Law in place in Germany since 2013, the S2C project with its EbPDAs also puts the patients’ rights into practice.         | The training program for physicians was developed / validated by Geiger et al. (17, 18, 26). This program guided the development of decision coach training for other health care professionals. Further evidence supported the refinement and adaptation of the coaching program to meet the specific demands in difficult indications/target populations in a hospital setting (27, 52).                                                                                      |
| Relative Advantage                     | The format of online EbPDAs with easy to understand written/graphical information, videos with patient narratives, and videos with physicians from the UKSH explaining disease or treatment concepts are likely attractive to patients and physicians.                                                                                                                                                                                                                 | The online SDM training is a relatively quick and easy-to-do training program teaching SDM basics to physicians. The video-feed-back based training is highly individualized and based on real patient-physician communication allowing a thorough SDM                                                                                                                                                                                                                          |

|              |                                                                                                                                                                                                                                                                                                                                                                                                                                                                                                                                                                                                                     |                                                                                                                                                                                                                                                                                                                                                                                                                                                                                                                                                                                                   |
|--------------|---------------------------------------------------------------------------------------------------------------------------------------------------------------------------------------------------------------------------------------------------------------------------------------------------------------------------------------------------------------------------------------------------------------------------------------------------------------------------------------------------------------------------------------------------------------------------------------------------------------------|---------------------------------------------------------------------------------------------------------------------------------------------------------------------------------------------------------------------------------------------------------------------------------------------------------------------------------------------------------------------------------------------------------------------------------------------------------------------------------------------------------------------------------------------------------------------------------------------------|
|              | While physicians are involved in development and invest time into it, EbPDAs will facilitate better informed dialogue with patients. By providing more structure to the dialogue, EbPDAs are expected to make communication more efficient (48).                                                                                                                                                                                                                                                                                                                                                                    | learning experience. The training for decision coaching focuses on providing support with EbPDA use to patient, especially if patients are emotionally or physically not able to effectively use EbPDAs without support.                                                                                                                                                                                                                                                                                                                                                                          |
| Adaptability | The format of the EbPDAs follows a standard structure. However, this structure is flexible. It allows for topic- or clinic-specific adaptations. Online decision aids will be administered to patients via printed access codes that patients receive in an envelope. Each EbPDA will contain a printable summary sheet on all relevant aspects of alternatives (Questions & Answers-Sheet). This paper-based version can be used in communication with patients not willing or able to use the online EbPDAs.                                                                                                      | Training units are flexible and adaptable to specific demands. The online training can be easily integrated into a busy physician schedule. If physicians do not want to do personal training in a group setting, it can be done with physicians individually. If health care providers are not willing to video-tape interactions with their patients, trainers may offer participating observation instead and rate “live” patient-physician interactions. Other adaptations might be needed throughout.                                                                                        |
| Trialability | Each clinic starts with 1 or 2 EbPDAs. If a clinic is interested to support further topics, additional EbPDAs may be developed. If a clinic is rather unwilling to support the project, no pressure will be exerted but the clinic may rejoin EbPDA development at a later point in time. Also, since the clinical departments are approached in a stepwise approach, learnings from one clinic might be transferred. Features of the EbPDAs may be adapted according to specific clinic or patient needs (length of texts, number of films, graphics, description of clinical studies, strength of evidence, ect.) | It is not an imperative for UKSH staff to undergo SDM training sessions, but clinic directors are asked to motivate their staff to take part in these. Also, clinic directors are asked to make sure that training sessions can be done within working hours. If a clinic is unwilling to support the project at a specific point in time or to provide the time to their physicians to undergo training, no further pressure will be exerted. In selected instances (e.g., if physicians of a department are under extreme time pressure), SDM training might remain limited to online sessions. |
| Complexity   | Patients will have to invest at least 30-60 minutes to go through one EbPDA. This might be tiring to some patients. The patient-friendly and flexible format of EbPDAs addresses this issue in                                                                                                                                                                                                                                                                                                                                                                                                                      | Training sessions for physicians and decision coaches are time-consuming, between 1-2 full days for physicians and for those who undergo training as decision coaches. This time needs to be                                                                                                                                                                                                                                                                                                                                                                                                      |

1  
2  
3  
4  
5  
6  
7  
8  
9  
10  
11  
12  
13  
14  
15  
16  
17  
18  
19  
20  
21  
22  
23  
24  
25  
26  
27  
28  
29  
30  
31  
32  
33  
34  
35  
36  
37  
38  
39  
40  
41  
42  
43  
44  
45  
46  
47

|                            |                                                                                                                                                                                                                                                                                                                                                                                                                                                                                |                                                                                                                                                                                                                                                                                                                                                                                                                                                                                                                |
|----------------------------|--------------------------------------------------------------------------------------------------------------------------------------------------------------------------------------------------------------------------------------------------------------------------------------------------------------------------------------------------------------------------------------------------------------------------------------------------------------------------------|----------------------------------------------------------------------------------------------------------------------------------------------------------------------------------------------------------------------------------------------------------------------------------------------------------------------------------------------------------------------------------------------------------------------------------------------------------------------------------------------------------------|
|                            | parts. Availability via the bedside - “Infotainment”-system at UKSH and via portable tablets will make access to EbPDAs easy for patients. Physicians have to invest time for EbPDAs. They might not initially appreciate that EbPDAs can help save time in patient communication. Also, the departments/ physicians will have to integrate the EbPDAs into patient pathways. This might not always be easy in a busy hospital setting and make pathway adaptations necessary. | provided by clinic directors but it might still be difficult to integrate training sessions into a busy clinic schedule. Health care staff might refuse videotaping themselves in patient interaction for various reasons (e.g., worries about an external rating of their performance). Even for well-trained physicians or decision coaches, it might sometimes be difficult to integrate SDM and decision coaching into interactions/treatment pathways. Adaptations of treatment pathways might be needed. |
| Design Quality & Packaging | The EbPDA is developed by a highly professional S2C team of medical writers working according to the standards of evidence-based patient information and a professional film team with wide experience in patient filming. Evidence syntheses are done by best-in class external consultants together with the S2C evidence team. All EbPDAs strictly adhere to the IPDAS criteria (37, 38).                                                                                   | All training sessions were developed and are conducted by a group of trained and experienced psychologists/coaches. The online-training was developed and realized by the S2C trainer team in cooperation with the S2C film team. All training evaluations strictly adhere to the rating criteria of the MAPPIN’SDM instrument (18, 26)                                                                                                                                                                        |
| Cost                       | Costs of the intervention and costs associated with implementation are covered by a grant of the German Innovation Fonds (IF). The IF is hosted at the Federal Joint Committee. Opportunity costs will occur since patients and physicians have to invest time in decision aid production and/or use. Research indicates that using EbPDAs in patient-physician-interaction can make communication and decisions more effective and more efficient (14, 48)                    | As for the EbPDAs all costs related to the development of training sessions are covered by the IF. Furthermore, physicians have to invest time into the different training sessions. Ideally, these can be done within their working hours. Physicians are rewarded by continued medical education credits by the German Medical Associations. Health care staff undergoing training as decision coaches will need to invest 2 full days.                                                                      |
| <b>II. OUTER SETTING</b>   |                                                                                                                                                                                                                                                                                                                                                                                                                                                                                |                                                                                                                                                                                                                                                                                                                                                                                                                                                                                                                |
| Patient Needs & Resources  | As primary cooperation partner in the S2C project, the administration of UKSH acknowledges the need for better patient participation and the resulting need for change. While it puts no formal pressure on its physicians to cooperate in the project, the directors of each                                                                                                                                                                                                  |                                                                                                                                                                                                                                                                                                                                                                                                                                                                                                                |

|                              |                                                                                                                                                                                                                                                                                                                                                                                                                                                                                                                                                                                                                                                                                                                                                                        |
|------------------------------|------------------------------------------------------------------------------------------------------------------------------------------------------------------------------------------------------------------------------------------------------------------------------------------------------------------------------------------------------------------------------------------------------------------------------------------------------------------------------------------------------------------------------------------------------------------------------------------------------------------------------------------------------------------------------------------------------------------------------------------------------------------------|
|                              | department are encouraged to provide support by signing specific SDM goal attainment contracts. In these, they agree to have their staff undergo training sessions within working hours and to motivate their physicians/other staff to support the S2C program.                                                                                                                                                                                                                                                                                                                                                                                                                                                                                                       |
| Cosmo-politicism             | UKSH and the S2C project team work in close cooperation with other (Inter)National players in the field of Evidence-based Medicine and SDM. Cooperation is initiated or ongoing with, e.g., the German Institute for Quality and Efficiency in Health Care (IQWiG, gesundheitsinformation.de) and the evidence-based guideline developers within the German Association of the Scientific Medical Societies (AWMF), primarily trying to avoid the redundant production of patient content or evidence reviews. At the International level, UKSH and the project team get engaged e.g. in the International Shared Decision Making (ISDM) Society.                                                                                                                      |
| Peer Pressure                | This is the first full implementation of SDM at a University Hospital in Germany. Nevertheless SDM is becoming increasingly demanded, i.e., it is on the German political agenda. For example, the AWMF established a committee to add EbPDAs to its evidence-based clinical guidelines. The German branch of Choosing Wisely claims to carry forward SDM. The National Cancer Plan and the National Plan for Health Literacy demand for SDM. Also, patient organizations and the German Independent Patient Council (UPB) stipulate SDM in health care.                                                                                                                                                                                                               |
| External Policy & Incentives | The objective of IF funded projects in Germany is to test new forms of health care provision, to scale them up and to finally transfer these into general statutory health insurance funding (in case of successful implementation). Therefore, the S2C project can be considered a “lighthouse” project, gaining a lot of attention in the media already. In the context of the Patients’ Rights Law and with SDM being a generally approved concept in German politics, this project aims to serve as a role model for other hospitals and settings. Cooperation with other National players (e.g. AWMF, IQWiG, German Society of Evidence Based Medicine, German Society for Health Literacy) aims to support this development towards more SDM-based patient care. |
| <b>III. INNER SETTING</b>    |                                                                                                                                                                                                                                                                                                                                                                                                                                                                                                                                                                                                                                                                                                                                                                        |
| Structural Characteristics   | The UKSH is a tertiary care hospital with 27 clinical departments. Each of these departments and all physicians will be involved. Since the UKSH is very hierarchically structured, our approach is to get departments involved in the project in a top-down approach. Clinic directors get involved first, followed by the physicians at the next-lower levels in the hierarchy. One physician in each clinic will be chosen together with the director to be the designated “SDM responsible” who oversees activities in the respective clinic (e.g. training activities, EbPDA development, patient activation activities). Other physicians will be responsible for individual EbPDA                                                                               |

|                                            |                                                                                                                                                                                                                                                                                                                                                                                                                                                                                                                                                                                                                                                                                                                                                                                                                                                                                                                                                     |
|--------------------------------------------|-----------------------------------------------------------------------------------------------------------------------------------------------------------------------------------------------------------------------------------------------------------------------------------------------------------------------------------------------------------------------------------------------------------------------------------------------------------------------------------------------------------------------------------------------------------------------------------------------------------------------------------------------------------------------------------------------------------------------------------------------------------------------------------------------------------------------------------------------------------------------------------------------------------------------------------------------------|
|                                            | topics and it is assumed that early involvement of physicians in EbPDA development will increase their acceptance and support. At the same time the UKSH Employee Committee and individual multipliers (“clinical champions”) will be involved early in the project.                                                                                                                                                                                                                                                                                                                                                                                                                                                                                                                                                                                                                                                                                |
| Networks & Communications                  | At the level of physicians, the hierarchical structures need to be respected and taken into account. If the director supports SDM, it is assumed to be more likely that the entire clinic supports SDM. At the patient level, the UKSH offers the Infotainment system which can be used to make EbPDAs available to patients at the bedside.                                                                                                                                                                                                                                                                                                                                                                                                                                                                                                                                                                                                        |
| Implementation Climate                     | Our objective in this project is nothing less than to initiate a paradigm shift towards more SDM-based health care in an entire hospital setting. While the UKSH is open for change at an administrative level, time and economic constraints might limit the physicians’ willingness and perceived liberty to support the project. Implementation climate will be assessed using summative (Patient questionnaire; MAPPIN’SDM evaluation) and process evaluation components (based on the CFIR constructs and NPT) as described.                                                                                                                                                                                                                                                                                                                                                                                                                   |
| Readiness for change                       | While the UKSH is open for change at an administrative level, time and economic constraints might limit the physicians’ willingness and perceived liberty to support the project.                                                                                                                                                                                                                                                                                                                                                                                                                                                                                                                                                                                                                                                                                                                                                                   |
| <b>IV. CHARACTERISTICS OF INDIVIDUALS</b>  |                                                                                                                                                                                                                                                                                                                                                                                                                                                                                                                                                                                                                                                                                                                                                                                                                                                                                                                                                     |
| Knowledge & Beliefs about the Intervention | Preliminary research indicates that many patients in the UKSH setting might not yet be regularly involved in decisions, but are open to more information and more involvement. Individuals’ attitudes toward the SDM interventions and their role in it will be measured in the pre-post evaluation by (1) using a range of patient-based instruments to assess patient-physician interaction and the perceived role of the patient before and after the interventions. (2) using the MAPPIN’SDM instrument to get a reviewer perspective on whether interventions/trainings influence/improve patient-physician interaction. Physicians might often rather focus on the demands placed on them by the S2C project team and less on the potential advantages/time savings in patient communication. NPT-based questionnaires/interviews to assess key stakeholder/physician perceptions of the intervention throughout implementation will be used. |
| <b>V. PROCESS</b>                          |                                                                                                                                                                                                                                                                                                                                                                                                                                                                                                                                                                                                                                                                                                                                                                                                                                                                                                                                                     |
| Planning                                   | The individual components of the S2C program have been tested/validated previously in other contexts and will be implemented by a team of implementation experts.                                                                                                                                                                                                                                                                                                                                                                                                                                                                                                                                                                                                                                                                                                                                                                                   |
| Engaging                                   | The S2C team consists of four teams: the <u>evidence team</u> , the <u>decision aid team</u> (working closely together on decision aids), the <u>trainer team</u> (physician training, training for “decision coaching”), and the <u>implementation team</u> (engaging at all levels in implementation-                                                                                                                                                                                                                                                                                                                                                                                                                                                                                                                                                                                                                                             |

|                                 |                                                                                                                                                                                                                                                                                                                                                                                                        |
|---------------------------------|--------------------------------------------------------------------------------------------------------------------------------------------------------------------------------------------------------------------------------------------------------------------------------------------------------------------------------------------------------------------------------------------------------|
|                                 | related activities in the hospital, e.g. recruiting patients for needs assessments, reminding physicians or other health care professionals to undergo trainings etc.). Besides, the latter will realize patient activation and other marketing/exchange initiatives to foster engagement and identification with the S2C concept among patients and health care staff.                                |
| Opinion Leaders                 | The directors of each clinic and other “SDM champions” are important to actively support the S2C intervention and engage their physicians to follow them. Also, the “SDM physician” at each clinic plays a crucial role in this context.                                                                                                                                                               |
| Internal Implementation Leaders | One physician in each clinic will be the designated “SDM physician” who oversees activities in the respective clinic. For each EbPDA topic, one physician or a group of physicians will be nominated to carry primary responsibility from a clinical point of view. These physicians are expected to support the S2C team and drive project activities forward in the respective department.           |
| Champions                       | The “personal flagship” of the project, Dr. Eckhart von Hirschhausen, is a very prominent TV-physician, comedian and moderator. He will play a very active role in project marketing. He will be present in videos and on posters and demonstrate his support of the S2C program at all levels and in all its components. Dr. von Hirschhausen is also an official cooperation partner in the project. |
| Executing                       | The German Innovation Fund as national sponsor requires regular milestone reports on project success every six months.                                                                                                                                                                                                                                                                                 |
| Reflecting & Evaluating         | All S2C teams will continuously report on the progress of implementing S2C in their respective domain and document issues, problems or highlights throughout the course of project time (field notes/documentation)                                                                                                                                                                                    |

1 \*The intervention component “patient activation program” is not separately described in the CFIR table but in the publication text only, given that this program is  
 2 limited to accompanying marketing and information strategies within each clinic using postcards, posters and stand-up-boards.

1 Table 2. Details on outcome measurement

| <b>Outcomes elicited from patient perspective via Patient Questionnaire</b>                                                                 |                                                                                 |                                                                                                             |                                                                                                                                                                                                                            |                                                                                                                                                                                                                                                                                   |                                                                                                                                                                                           |                                                                                                                     |
|---------------------------------------------------------------------------------------------------------------------------------------------|---------------------------------------------------------------------------------|-------------------------------------------------------------------------------------------------------------|----------------------------------------------------------------------------------------------------------------------------------------------------------------------------------------------------------------------------|-----------------------------------------------------------------------------------------------------------------------------------------------------------------------------------------------------------------------------------------------------------------------------------|-------------------------------------------------------------------------------------------------------------------------------------------------------------------------------------------|---------------------------------------------------------------------------------------------------------------------|
| <b>Outcome, Instrument</b>                                                                                                                  | <b>Outcome definition</b>                                                       | <b>Target population</b>                                                                                    | <b>Measurement scale</b>                                                                                                                                                                                                   | <b>Reasons for Choice of Instrument</b>                                                                                                                                                                                                                                           | <b>Assessment schedule / mode (Time points, T0, T1, T2)</b>                                                                                                                               | <b>Planned number of interviewed individuals</b>                                                                    |
| Primary Outcome Measure (1): Perceived Involvement in Care Scales (PICS) (3 <sup>rd</sup> subscale used as primary outcome measure) (41,45) | Perceived Involvement in patient-physician interaction from patient perspective | Sample of UKSH patients receiving patient questionnaires (all clinical departments or specific departments) | 3 subscales:<br>1.doctor facilitation of patient involvement<br>2.level of patient’s active information seeking<br>3.perceived patient involvement<br>Individual scores range from 1 (no agreement) to 4 (total agreement) | Measures patient perception of involvement in decision making with physician in general, not restricted to or focused on one specific decision situation; Takes the perspective of a patient and is not limited to assessing the patient perceived degree of physician’s endeavor | T0: before program starts (baseline)<br>T1: after completion of program in each department;<br>immediate effect<br>T2: 6 months before the end of the project: sustainability of “effect” | 1.600 at T0 and T2, respectively; a minimum of 40 per clinic at T1; Different samples are taken at each measurement |
| Secondary Outcome Measure: Preparation for Decision Making Scale (PREP-DM-Scale) (42)                                                       | Perceived level of individual preparation for decision situation                | same as for PICS                                                                                            | 10 items<br>Individual scores in patient questionnaire range from 1 (no agreement) to 5 (total agreement)                                                                                                                  | Measures patient perception of involvement in decision making going beyond patient-physician communication, e.g. brochures, decision aids, information provided via other health care professionals.                                                                              | T0, T1, T2                                                                                                                                                                                | same as for PICS                                                                                                    |



| Outcome, Instrument                                        | Outcome definition                                                                                                                                                                                     | Target population                                                  | Measurement scale                                                                                                                                                                                                                                                                                                                                                                             | Reasons for Choice of Instrument                                                                                                                                                       | Assessment schedule / mode (Time points, T0, T1, T2)                                                                                 | Planned number of interviewed individuals                                                                                                                                                                                                         |
|------------------------------------------------------------|--------------------------------------------------------------------------------------------------------------------------------------------------------------------------------------------------------|--------------------------------------------------------------------|-----------------------------------------------------------------------------------------------------------------------------------------------------------------------------------------------------------------------------------------------------------------------------------------------------------------------------------------------------------------------------------------------|----------------------------------------------------------------------------------------------------------------------------------------------------------------------------------------|--------------------------------------------------------------------------------------------------------------------------------------|---------------------------------------------------------------------------------------------------------------------------------------------------------------------------------------------------------------------------------------------------|
| Secondary Outcome Measure: Collaborative RATE (43)         | Perceived level of attempts being made by physicians to actively involve patients in decision making                                                                                                   | Same as for PICS                                                   | 3 items<br>Individual scores in patient questionnaire range from 1 (received no attention) to 5 (received much attention)                                                                                                                                                                                                                                                                     | Allows comparison with other studies, since this questionnaire is widely used internationally.                                                                                         | T0, T1, T2                                                                                                                           | same as for PICS                                                                                                                                                                                                                                  |
| <b>Outcomes elicited from observer perspective</b>         |                                                                                                                                                                                                        |                                                                    |                                                                                                                                                                                                                                                                                                                                                                                               |                                                                                                                                                                                        |                                                                                                                                      |                                                                                                                                                                                                                                                   |
| Primary Outcome Measure (2): MAPPIN' SDM-O-dyad (17,18,19) | Observer-based assessment of how well the physician-patient interaction is performed with respect to the MAPPIN' SDM criteria<br>Conducted by trained raters based on videos of specific interactions. | Patients and physicians in a personal decision-related interaction | Based on a MAPPIN' SDM rater manual.<br>6 items reflecting the 6 steps in shared decision making<br>Item 1: problem definition<br>Item 2: key SDM message (structure)<br>Item 3a: options (content)<br>Item 3b: options (quality of information)<br>Item 3c: options (quality of information)<br>Item 4: Patient expectations and worries<br>Item 5: Decision making<br>Item 6: Further steps | Provides an "objective" assessment of the patient-physician interaction by an independent rater, with respect to both interaction participants, the patient and the physician ("dyad") | T0, T1<br>Individual patient physician encounters at clinical departments*<br><br>Rater is blinded to the timing of the video taken. | 200-220 patient-physician interactions (all physicians at 7 involved clinical departments will submit one video at each measurement time point)*<br>Physicians are mostly the same at each measurement but patients in interaction are different. |

\* Evaluated clinical departments at the University Hospital Campus Kiel are: general surgery, internal medicine I (gastroenterology, hepatology, pneumology, internal intensive care medicine, endocrinology, infectiology, rheumatology, nutritional and ageing medicine), radiotherapy, internal medicine II (hematology, oncology), trauma surgery & orthopedics, gynecology and urology

1  
2  
3  
4  
5  
6  
7  
8  
9  
10  
11  
12  
13  
14  
15  
16  
17  
18  
19  
20  
21  
22  
23  
24  
25  
26  
27  
28  
29  
30  
31  
32  
33  
34  
35  
36  
37  
38  
39  
40  
41  
42  
43  
44  
45  
46  
47  
48  
49  
50  
51  
52  
53  
54  
55  
56  
57  
58  
59  
60

1 **Legend of Figures:**

- 2 Figure 1. Project components and respective S2C project teams
- 3 Figure 2. Sequential quarterly enrollment of new clinical departments
- 4 Figure 3. Project stages and data collection schedule for SDM evaluation

For peer review only

## 1 **Acknowledgements**

2 The authors acknowledge Juergen Kasper and Katrin Liethmann for their tremendous contributions to the  
3 development of the study concept and intervention program.

## 4 **Authors' contributions**

5 FG, FS, KW and JR developed the study concept and methods, designed the intervention program and are  
6 responsible for its implementation. LS and AN developed the evaluation concept and are responsible for  
7 its realization. TS and CK provided substantial scientific and methodological contribution. AR and MDE  
8 provided methodological input and critically revised the manuscript. MD drafted the manuscript and  
9 provided scientific and methodological input to the study concept.

## 10 **Funding**

11 This work was supported by a grant of the German Innovation Fonds (hosted by the Federal Joint  
12 Committee), grant number 01NVF17009

## 13 **Competing Interests**

14 FG, FS, JUR and KW incorporated the SHARE TO CARE GmbH (<https://share-to-care.de/>), to  
15 perpetuate the resulting interventions/experiences of this project. This is the decided will of the funding  
16 body and has been communicated transparently.

## 17 **Ethics Approval**

18 This study was approved by the Medical Ethics Committee of the Medical Faculty of the Christian  
19 Albrecht University (CAU) Kiel, reference number A111/18

20

## 1        2        3        4        5        6        7        8        9        10        11        12        13        14        15        16        17        18        19        20        21        22        23        24        25        26        27        28        29        30        31        32        33        34        35        36        37        38        39        40        41        42        43        44        45        46        47        48        49        50        51        52        53        54        55        56        57        58        59        60

1. Wehkamp KH, Naegler H. The commercialization of patient-related decision-making in hospital - a qualitative study of the perceptions of doctors and chief executive officers. *Dtsch Arztebl Int* 2017;114:797-804.
2. Gemeinsam entscheiden im Klinikalltag: Ergebnisse von Fokusgruppengesprächen mit jungen Ärzten. Bertelsmann Stiftung 2018. file:///C:/SDM%20Transfer/Publikation%20SDM%20Projekt/Literatur/Bittner\_2018\_VV\_Studie\_Gemeinsam\_entscheiden\_final\_online.pdf. [accessed 06/22/2020]
3. Stacey D, Suwalska V, Boland L, Lewis KB, Presseau J, Thomson R. Are Patient Decision Aids Used in Clinical Practice after Rigorous Evaluation? A Survey of Trial Authors. *Med Decis Making* 2019;39(7):805-15.
4. Harter M, Dirmaier J, Scholl I, Donner-Banzhoff N, Dierks ML, Eich W, et al. The long way of implementing patient-centered care and shared decision making in Germany. *Z Evid Fortbild Qual Gesundheitswes* 2017;123-124:46-51.
5. Tan ASL, Mazor KM, McDonald D, Lee SJ, McNeal D, Matlock DD, et al. Designing Shared Decision-Making Interventions for Dissemination and Sustainment: Can Implementation Science Help Translate Shared Decision Making Into Routine Practice? *MDM Policy Pract* 2018;3(2):2381468318808503.
6. Gesetz zur Verbesserung der Rechte von Patientinnen und Patienten (Law for the Improvement of Patients' Rights). 2013. [https://www.bundesaerztekammer.de/fileadmin/user\\_upload/downloads/Patientenrechtgesetz\\_BGBI.pdf](https://www.bundesaerztekammer.de/fileadmin/user_upload/downloads/Patientenrechtgesetz_BGBI.pdf) [accessed 06/22/2020]
7. Coulter A. Shared decision making: everyone wants it, so why isn't it happening? *World J Psychiatry* 2017;16(2):117-8.
8. Maskrey N. Shared decision making: why the slow progress? An essay by Neal Maskrey. *BMJ* 2019;367:l6762.
9. Damschroder LJ, Aron DC, Keith RE, Kirsh SR, Alexander JA, Lowery JC. Fostering implementation of health services research findings into practice: a consolidated framework for advancing implementation science. *Implement Sci.* 2009;4:50.
10. Kasper J, Lager AR, Rumpsfeld M, Kienlin S, Smestad KH, Brathen T, et al. Status report from Norway: Implementation of patient involvement in Norwegian health care. *Z Evid Fortbild Qual Gesundheitswes* 2017;123-124:75-80.
11. Muller E, Strukava A, Scholl I, Harter M, Diouf NT, Legare F, et al. Strategies to evaluate healthcare provider trainings in shared decision-making (SDM): a systematic review of evaluation studies. *BMJ Open.* 2019;9(6):e026488.

12. Stacey D, Kryworuchko J, Bennett C, Murray MA, Mullan S, Legare F. Decision coaching to prepare patients for making health decisions: a systematic review of decision coaching in trials of patient decision aids. *Med Decis Making* 2012;32(3):E22-33.
13. Stacey D, Kryworuchko J, Belkora J, Davison BJ, Durand MA, Eden KB, et al. Coaching and guidance with patient decision aids: A review of theoretical and empirical evidence. *BMC Med Inform Decis Mak* 2013;13 Suppl 2:S11.
14. Stacey D, Legare F, Lewis K, Barry MJ, Bennett CL, Eden KB, et al. Decision aids for people facing health treatment or screening decisions. *Cochrane Database Syst Rev* 2017;4:CD001431.
15. Legare F, Adekpedjou R, Stacey D, Turcotte S, Kryworuchko J, Graham ID, et al. Interventions for increasing the use of shared decision making by healthcare professionals. *Cochrane Database Syst Rev* 2018;7:CD006732.
16. van Weert JC, van Munster BC, Sanders R, Spijker R, Hooft L, Jansen J. Decision aids to help older people make health decisions: a systematic review and meta-analysis. *BMC Med Inform Decis Mak* 2016;16:45.
17. Kasper J, Liethmann K, Heesen C, Reissmann DR, Geiger F. Training doctors briefly and in situ to involve their patients in making medical decisions-Preliminary testing of a newly developed module. *Health Expect* 2017;20(6):1254-63.
18. Geiger F, Liethmann K, Reitz D, Galalae R, Kasper J. Efficacy of the doktormitSDM training module in supporting shared decision making - Results from a multicenter double-blind randomized controlled trial. *Patient Educ Couns* 2017;100(12):2331-8.
19. Kienlin S, Kristiansen M, Ofstad E, Liethmann K, Geiger F, Joranger P, et al. Validation of the Norwegian version of MAPPIN'SDM, an observation-based instrument to measure shared decision-making in clinical encounters. *Patient Educ Couns* 2017;100(3):534-41.
20. Campbell M, Fitzpatrick R, Haines A, Kinmonth AL, Sandercock P, Spiegelhalter D, et al. Framework for design and evaluation of complex interventions to improve health. *BMJ* 2000;321(7262):694-6.
21. Campbell NC, Murray E, Darbyshire J, Emery J, Farmer A, Griffiths F, et al. Designing and evaluating complex interventions to improve health care. *BMJ* 2007;334(7591):455-9.
22. Søndergaard SR, Madsen PH, Hilberg O, Jensen KM, Olling K, Steffensen KD. A prospective cohort study of shared decision making in lung cancer diagnostics: Impact of using a patient decision aid. *Patient Educ Couns* 2019;102(11):1961-8.
23. Steffensen KD, Vinter M, Cruger D, Dankl K, Coulter A, Stuart B, et al. Lessons in Integrating Shared Decision-Making Into Cancer Care. *J Oncol Pract* 2018;14(4):229-35.

- 1  
2  
3 1 24.Scholl I, Hahlweg P, Lindig A, Bokemeyer C, Coym A, Hanken H, et al. Evaluation of a program for  
4 routine implementation of shared decision-making in cancer care: study protocol of a stepped wedge  
5 2 cluster randomized trial. *Implement Sci* 2018;13(1):51.  
6 3  
7 4 25.Moore GF, Audrey S, Barker M, Bond L, Bonell C, Hardeman W, et al. Process evaluation of  
8 5 complex interventions: Medical Research Council guidance. *BMJ* 2015;350:h1258.  
9 6  
10 7 26.Geiger F, Liethmann K, Hoffmann F, Paschedag J, Kasper J. Investigating a training supporting  
11 8 Shared Decision Making (IT'S SDM 2011): study protocol for a randomized controlled trial. *Trials*  
12 9 2011;12:232.  
13 10  
14 11 27.Berger-Hoger B, Liethmann K, Muhlhauser I, Haastert B, Steckelberg A. Informed shared decision-  
15 12 making supported by decision coaches for women with ductal carcinoma in situ: study protocol for a  
16 13 cluster randomized controlled trial. *Trials* 2015;16:452.  
17 14  
18 15 28.Shepherd HL, Barratt A, Jones A, Bateson D, Carey K, Trevena LJ, et al. Can consumers learn to ask  
19 16 three questions to improve shared decision making? A feasibility study of the ASK (AskShareKnow)  
20 17 Patient-Clinician Communication Model((R)) intervention in a primary health-care setting. *Health*  
21 18 *Expect* 2016;19(5):1160-8.  
22 19  
23 20 29.Shepherd HL, Barratt A, Trevena LJ, McGeechan K, Carey K, Epstein RM, et al. Three questions that  
24 21 patients can ask to improve the quality of information physicians give about treatment options: a cross-  
25 22 over trial. *Patient Educ Couns* 2011;84(3):379-85.  
26 23  
27 24 30.Aijzen I. The Theory of Planned Behavior. *Organ Behav and Hum Decis Process* 1991;50:179-211.  
28 25  
29 26 31.Fishbein M. A reasoned action approach to health promotion. *Med Decis Making* 2008;28(6):834-44.  
30 27  
31 28 32.May CR, Finch T, Ballini L, MacFarlane A, Mair F, Murray E, et al. Evaluating complex interventions  
32 29 and health technologies using normalization process theory: development of a simplified approach and  
33 30 web-enabled toolkit. *BMC Health Serv Res* 2011;11:245.  
34 31  
35 32 33.Scalia P, Durand MA, Forcino RC, Schubbe D, Barr PJ, O'Brien N, et al. Implementation of the  
36 33 uterine fibroids Option Grid patient decision aids across five organizational settings: a randomized  
37 34 stepped-wedge study protocol. *Implement Sci* 2019;14(1):88.  
38 35  
39 36 34.Kirk MA, Kelley C, Yankey N, Birken SA, Abadie B, Damschroder L. A systematic review of the use  
40 37 of the Consolidated Framework for Implementation Research. *Implement Sci* 2016;11:72.  
41 38  
42 39 35.Leitlinie evidenzbasierte Gesundheitsinformation. 2017. <http://www.leitliniegesundheitsinformation>  
43 40 .de/ [accessed 06/22/2020]  
44 41  
45 42 36.General Methods 5.0. IQWiG. 2017. file:///C:/Users/DANNER~1.TAK/AppData/Local/Temp/  
46 43 General-Methods\_Version-5-0.pdf. [accessed 05/24/2020]  
47 44  
48 45  
49 46  
50 47  
51 48  
52 49  
53 50  
54 51  
55 52  
56 53  
57 54  
58 55  
59 56  
60 57

- 1  
2  
3 1 37.Elwyn G, O'Connor A, Stacey D, Volk R, Edwards A, Coulter A, et al. Developing a quality criteria  
4 framework for patient decision aids: online international Delphi consensus process. *BMJ*  
5 2 2006;333(7565):417.  
6 3  
7  
8 4 38.Holmes-Rovner M. International Patient Decision Aid Standards (IPDAS): beyond decision aids to  
9 usual design of patient education materials. *Health Expect* 2007;10(2):103-7.  
10 5  
11 6 39.Stacey D, Murray MA, Legare F, Sandy D, Menard P, O'Connor A. Decision coaching to support  
12 shared decision making: a framework, evidence, and implications for nursing practice, education, and  
13 7 policy. *Worldviews Evid Based Nurs* 2008;5(1):25-35.  
14 8  
15 9 40.Lerman CE, Brody DS, Caputo GC, Smith DG, Lazaro CG, Wolfson HG. Patients' Perceived  
16 Involvement in Care Scale: relationship to attitudes about illness and medical care. *J Gen Intern Med*  
17 10 1990;5(1):29-33.  
18 11  
19 12 41.Scheibler F, Freise D, Pfaff H. Die Einbeziehung von Patienten in die Behandlung - Validierung der  
20 deutschen PICS Skalen. *Journal of Public Health* 2004;12:199-209.  
21 13  
22 14 42.Bennett C, Graham ID, Kristjansson E, Kearing SA, Clay KF, O'Connor AM. Validation of a  
23 preparation for decision making scale. *Patient Educ Couns* 2010;78(1):130-3.  
24 15  
25 16 43.Forcino RC, Barr PJ, O'Malley AJ, Arend R, Castaldo MG, Ozanne EM, et al. Using CollaboRATE, a  
26 brief patient-reported measure of shared decision making: Results from three clinical settings in the  
27 17 United States. *Health Expect* 2018;21(1):82-9.  
28 18  
29 19 44.Dillmann DA. Mail and Internet Surveys. The Tailored Design Method. Wiley. New York 2007.  
30 20  
31 21 45.Scheibler F, Pfaff H, Kowalski C, Ansmann L. Shared Decision Making in Breast Care Centers in  
32 North Rhine-Westphalia: Results of a 10-year trend analysis (article in press). *Z Evid Fortb Qual*  
33 22 *Gesundhwes* 2019.  
34 23  
35 24 46.Herold R, van den Berg N, Dorr M, Hoffmann W. Telemedical Care and Monitoring for Patients with  
36 Chronic Heart Failure Has a Positive Effect on Survival. *Health Serv Res* 2018;53(1):532-55.  
37 25  
38 26 47.Ho D, Imai K, King G, Stuart EA. Matching as Nonparametric Preprocessing for Reducing Model  
39 Dependence in Parametric Causal Inference. *Political Analysis* 2007;15:199-236.  
40 27  
41 28 48.Veroff D, Marr A, Wennberg DE. Enhanced support for shared decision making reduced costs of care  
42 for patients with preference-sensitive conditions. *Health Aff* 2013;32(2):285-93.  
43 29  
44 30 49.Rapley T, Girling M, Mair FS, Murray E, Treweek S, McColl E, et al. Improving the normalization of  
45 complex interventions: part 1 - development of the NoMAD instrument for assessing implementation  
46 work based on normalization process theory (NPT). *BMC Med Res Methodol* 2018;18(1):133.  
47 31  
48 32 50.Finch TL, Girling M, May CR, Mair FS, Murray E, Treweek S, et al. Improving the normalization of  
49 complex interventions: part 2 - validation of the NoMAD instrument for assessing implementation  
50 work based on normalization process theory (NPT). *BMC Med Res Methodol* 2018;18(1):135.  
51 33  
52 34  
53  
54  
55  
56  
57  
58  
59  
60

- 1  
2  
3 1 51. Finch TL, Rapley T, Girling M, Mair FS, Murray E, Treweek S, et al. Improving the normalization of  
4 2 complex interventions: measure development based on normalization process theory (NoMAD): study  
5 3 protocol. *Implement Sci* 2013;8:43.  
6  
7  
8 4 52. Rahn AC, Kopke S, Kasper J, Vettorazzi E, Muhlhauser I, Heesen C. Evaluator-blinded trial  
9 5 evaluating nurse-led immunotherapy Decision Coaching In persons with relapsing-remitting Multiple  
10 6 Sclerosis (DECIMS) and accompanying process evaluation: study protocol for a cluster randomised  
11 7 controlled trial. *Trials* 2015;16:106.  
12  
13  
14  
15  
16  
17  
18  
19  
20  
21  
22  
23  
24  
25  
26  
27  
28  
29  
30  
31  
32  
33  
34  
35  
36  
37  
38  
39  
40  
41  
42  
43  
44  
45  
46  
47  
48  
49  
50  
51  
52  
53  
54  
55  
56  
57  
58  
59  
60

For peer review only



1  
2  
3  
4  
5  
6  
7  
8  
9  
10  
11  
12  
13  
14  
15  
16  
17  
18  
19  
20  
21  
22  
23  
24  
25  
26  
27  
28  
29  
30  
31  
32  
33  
34  
35  
36  
37  
38  
39  
40  
41  
42  
43  
44  
45  
46  
47  
48  
49  
50  
51  
52  
53  
54  
55  
56  
57  
58  
59  
60

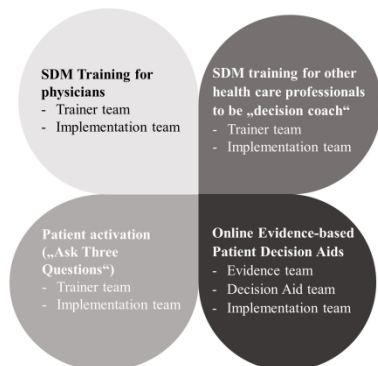

338x190mm (300 x 300 DPI)

1  
2  
3  
4  
5  
6  
7  
8  
9  
10  
11  
12  
13  
14  
15  
16  
17  
18  
19  
20  
21  
22  
23  
24  
25  
26  
27  
28  
29  
30  
31  
32  
33  
34  
35  
36  
37  
38  
39  
40  
41  
42  
43  
44  
45  
46  
47  
48  
49  
50  
51  
52  
53  
54  
55  
56  
57  
58  
59  
60

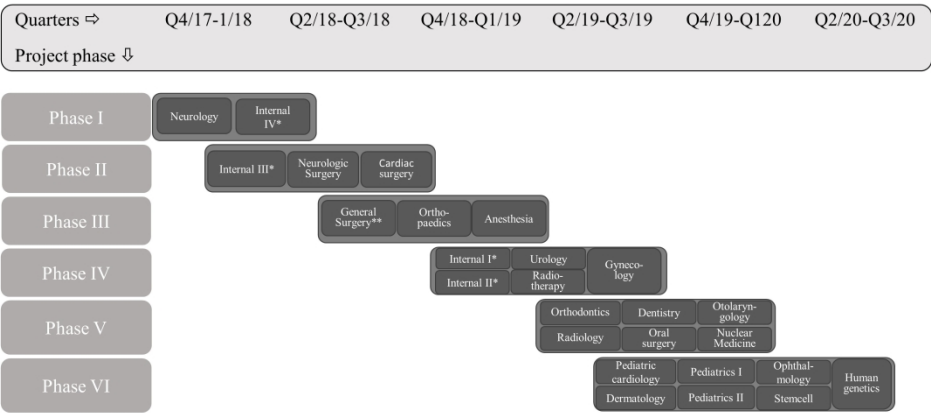

\*Internal I: gastroenterology, hepatology, pneumology, internal intensive care medicine, endocrinology, infectiology, rheumatology, nutritional and ageing medicine;  
 Internal II: hematology, oncology; Internal III: cardiology, angiology and internal intensive care medicine; Internal IV: renal and hypertensive diseases  
 \*\*General Surgery: visceral, thoracic, transplant and pediatric surgery

338x190mm (300 x 300 DPI)

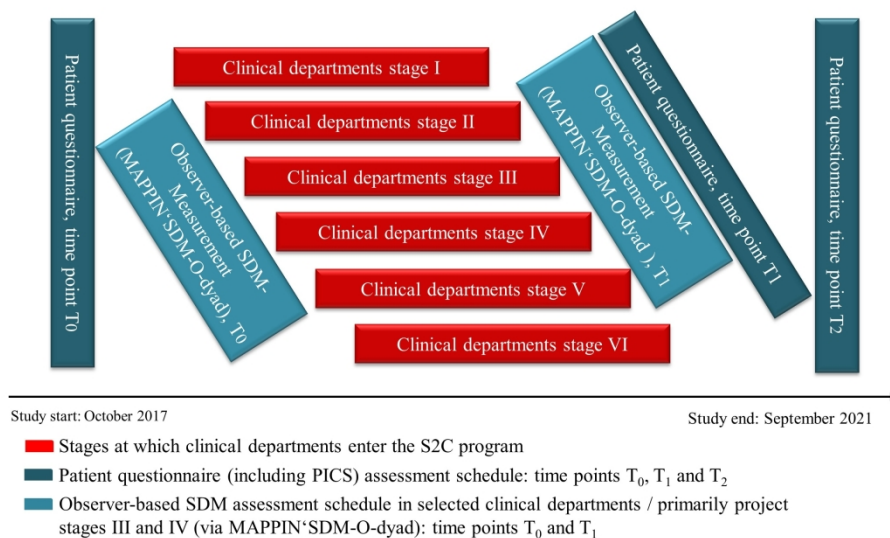

254x190mm (300 x 300 DPI)
